# Supplementary material for: New polyethyleneglycol-functionalized texaphyrins: synthesis and in vitro biological studies
Source: Royal Society of Chemistry journal article supplement (doi:10.1039/b515636j), 2006-01-01
Supplement: b515636j.pdf [file b515636j.pdf]

## **New polyethyleneglycol-functionalized texaphyrins: Synthesis and *in vitro* biological studies**

Wen-Hao Wei<sup>a</sup>, Zhong Wang<sup>b</sup>, Toshihisa Mizuno<sup>a†</sup>, Cecilia Cortez<sup>b</sup>, Lei Fu<sup>b</sup>, Darren Magda<sup>b</sup>,\* Jonathan L. Sessler<sup>a\*</sup>

<sup>a</sup>*Department of Chemistry and Biochemistry, Institute for Cellular and Molecular Biology, 1 University Station-A5300, The University of Texas at Austin, Austin, Texas. 78712-0165; E-mail: Sessler@mail.utexas.edu*

<sup>b</sup>*Pharmacyclics, Inc., 995 East Arques Avenue Sunnyvale, California. 94085 E-mail: dmagda@pcyc.com*

### **Contents of Supporting Information:**

**I: synthesis of 3,5-Bis[2-[2-(2-methoxyethoxy)ethoxy]ethoxy]-benzaldehyde.**  
(PageS2)

**II: cyclic voltammograms of 1 MGd, 2, 3, 4 and 5** (page S3-S7)

**III: X-ray experimental for 14** (page S8-S33)

Figure 1. View of **1** showing the atom labeling scheme.

Figure 2. Side view of **14**.

Figure 3. Unit cell packing diagram for **14**.

Table 1. Crystallographic Data for **14**.

Table 2. Fractional coordinates and equivalent isotropic thermal parameters ( $\text{\AA}^2$ ) for the non-hydrogen atoms of **14**.

Table 3. Bond Lengths ( $\text{\AA}$ ) and Angles ( $^\circ$ ) for the non-hydrogen atoms of **14**.

Table 4. Anisotropic thermal parameters for the non-hydrogen atoms of **14**.

Table 5. Fractional coordinates and isotropic thermal parameters ( $\text{\AA}^2$ ) for the hydrogen atoms of **14**.

Table 6. Torsion Angles ( $^\circ$ ) for the non-hydrogen atoms of **14**.

Figure 1. View of **14** showing the atom labeling scheme. Displacement ellipsoids are scaled to the 50% probability level.

**I: synthesis of 3,5-Bis[2-[2-(2-methoxyethoxy)ethoxy]ethoxy]-benzaldehyde.**

A solution of 3,5-dihydroxybenzaldehyde (0.70 g, 5.07 mmol) in dried MeCN (10 ml), was added into a solution of 2-[2-(2-methoxyethoxy)ethoxy]ethoxyethyl *p*-toluenesulfonate (4.83 g, 15.2 mmol). Then K<sub>2</sub>CO<sub>3</sub> (2.19 g, 15.8 mmol) was added and heated at reflux under argon overnight. The red suspension became yellow suspension, cooled and filtrated off yellow solid. The solid was washed with 50 ml of dichloromethane for 3 times. Combining solution was washed with H<sub>2</sub>O for 3 times and dried with Na<sub>2</sub>SO<sub>4</sub> overnight. Light yellow oil, compound 1 was obtained in 1.92 g, 88% after running column chromatography on silica (MeOH- CH<sub>2</sub>Cl<sub>2</sub>). CI-MS *m/z* 431 [M+1]<sup>+</sup>; <sup>1</sup>H NMR (250 Hz, CDCl<sub>3</sub>): 9.82 (s, 1H, CHO), 6.94 (s, 2H, Ar-H), 6.68 (s, 1H, Ar-H), 4.08 (t, *J* = 4.5 Hz, 4H, CH<sub>2</sub>), 3.78 (t, *J* = 4.5 Hz, 4H, CH<sub>2</sub>), 3.68-3.55 (m, 12H, CH<sub>2</sub>), 3.46 (t, *J* = 4.3 Hz 4H, CH<sub>2</sub>), 3.29 (s, 6H, CH<sub>3</sub>). <sup>13</sup>C NMR (63 MHz, CDCl<sub>3</sub>): 190, 160.8, 138.6, 108.4, 72.3, 71.2, 70.9, 70.8, 69.8, 68.2, 59.3.

I: cyclic voltammograms of 1 MGd, 2, 3, 4 and 5

1) 1 MGd

File Name: d:\eifu~1\1f011305\mgd(005).cv4  
Initial E (mV) = 0  
Forward E Limit (mV) = -1100  
Reverse E Limit (mV) = 0  
Final E (mV) = 0  
Scan Rate (mV/s) = 5  
Current Range (uA) = 100  
Noise Filter (us) = 50000  
Number of Scans (#) = 2  
No remarks

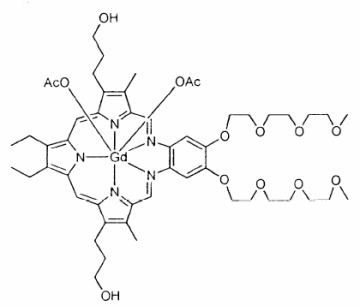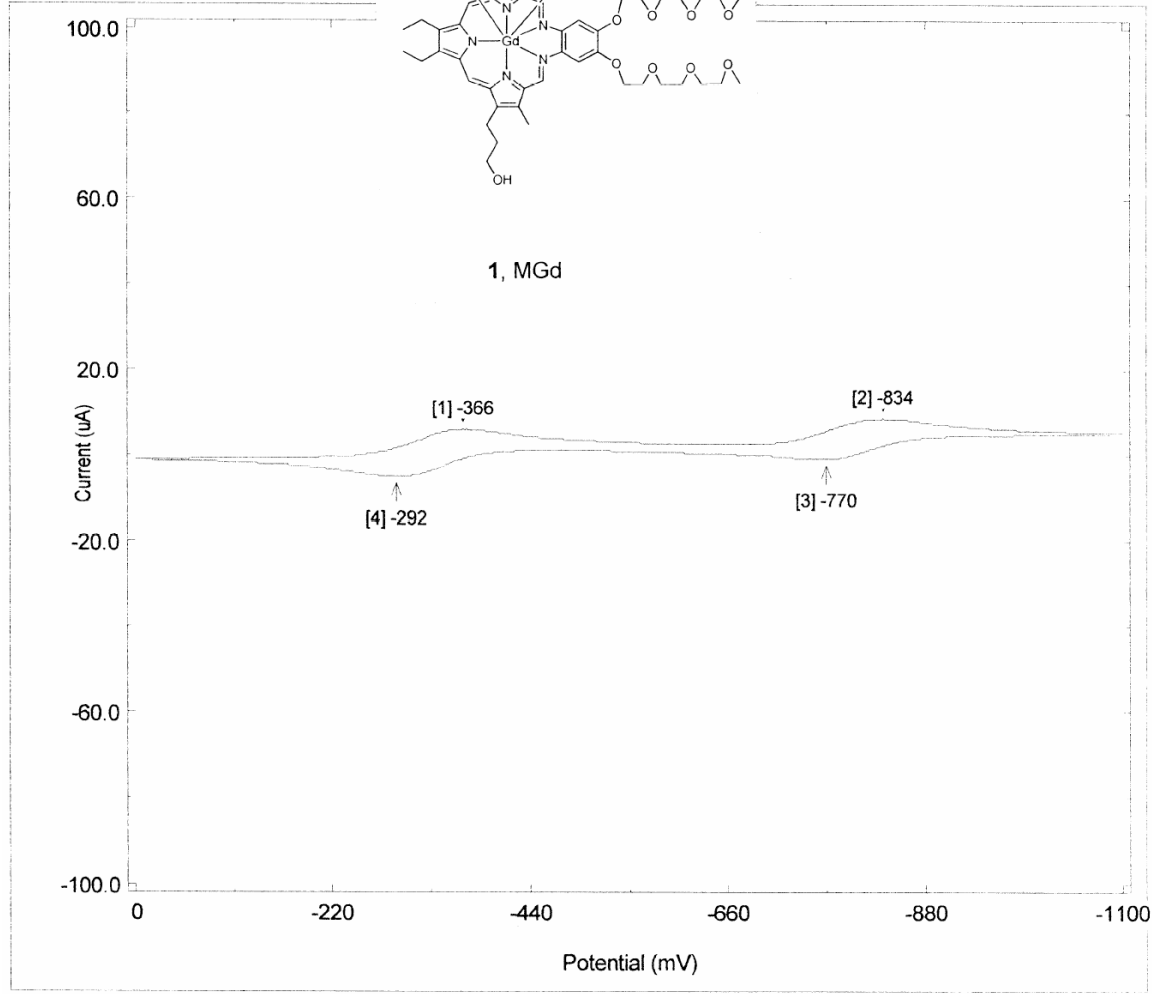

## 2) Texaphyrin 2

File Name: d:\zwang~1\zw010406\1500(3).cv4

Initial E (mV) = 0

Forward E Limit (mV) = -1100

Reverse E Limit (mV) = 0

Final E (mV) = 0

Scan Rate (mV/s) = 50

Current Range (uA) = 20

Noise Filter (us) = 5000

Number of Scans (#) = 2

No remarks

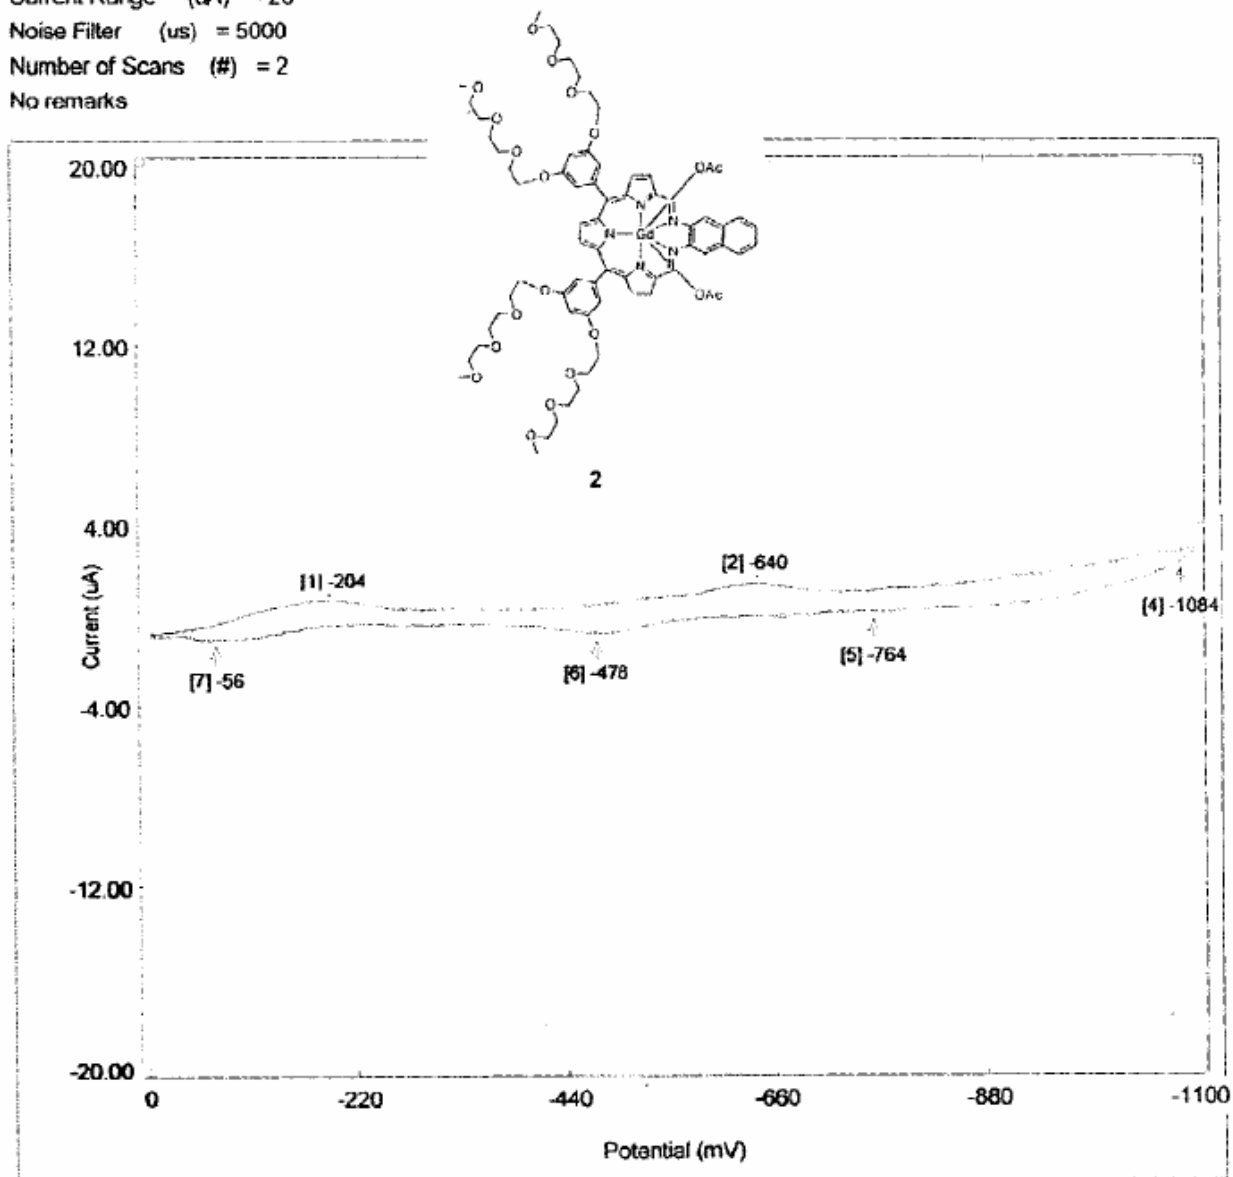

### 3) Texaphyrin 3

File Name: d:\leifu~1\lf011005\1530(3).cv4

Initial E (mV) = 0

Forward E Limit (mV) = -1100

Reverse E Limit (mV) = 0

Final E (mV) = 0

Scan Rate (mV/s) = 50

Current Range (uA) = 50

Noise Filter (us) = 5000

Number of Scans (#) = 2

No remarks

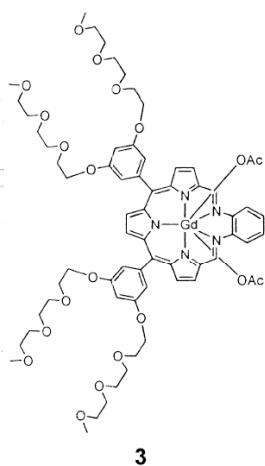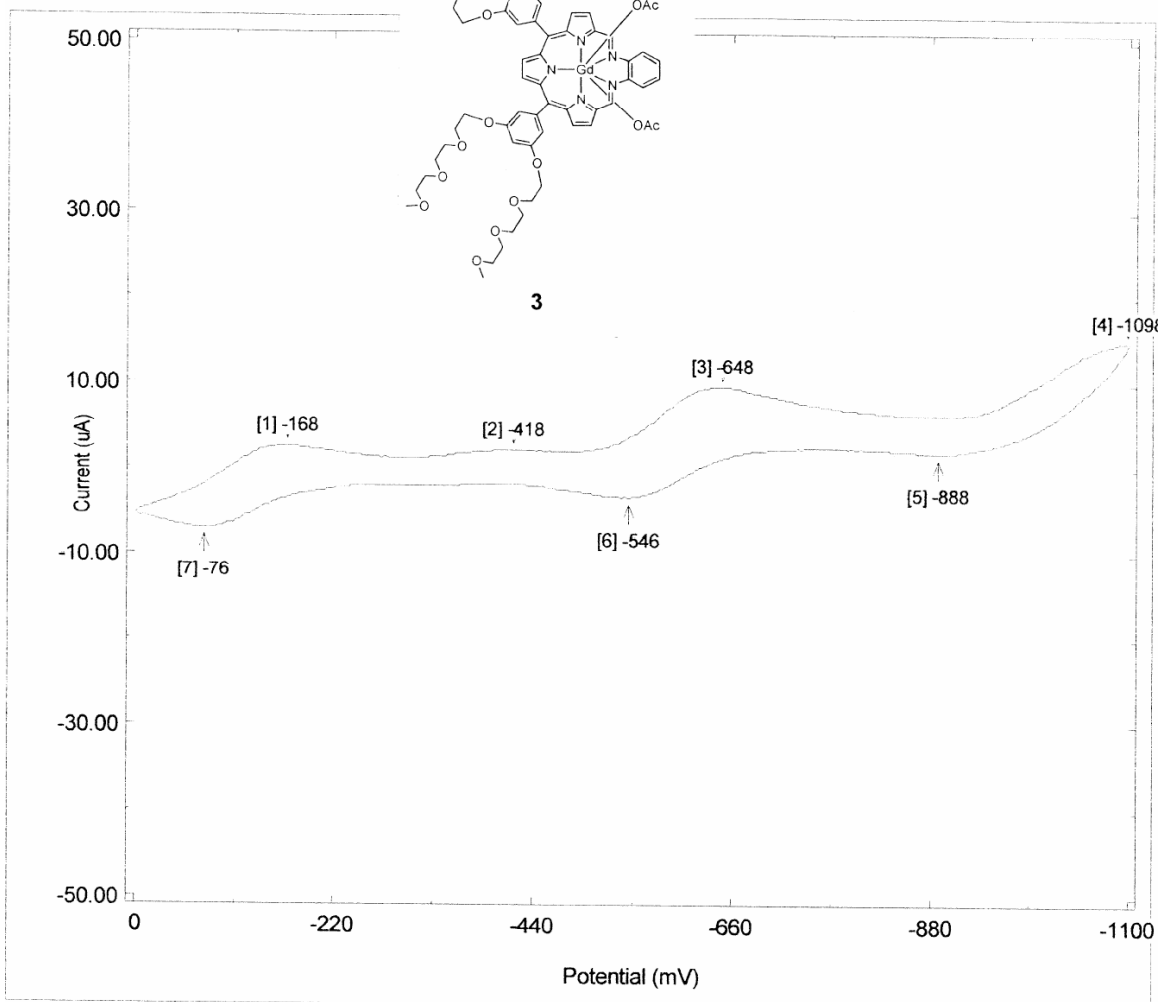

#### 4) Texaphyrin

File Name: d:\leifu-1\25jan05\1520(3).cv4

Initial E (mV) = 0

Forward E Limit (mV) = -1000

Reverse E Limit (mV) = 0

Final E (mV) = 0

Scan Rate (mV/s) = 50

Current Range (uA) = 50

Noise Filter (us) = 5000

Number of Scans (#) = 2

No remarks

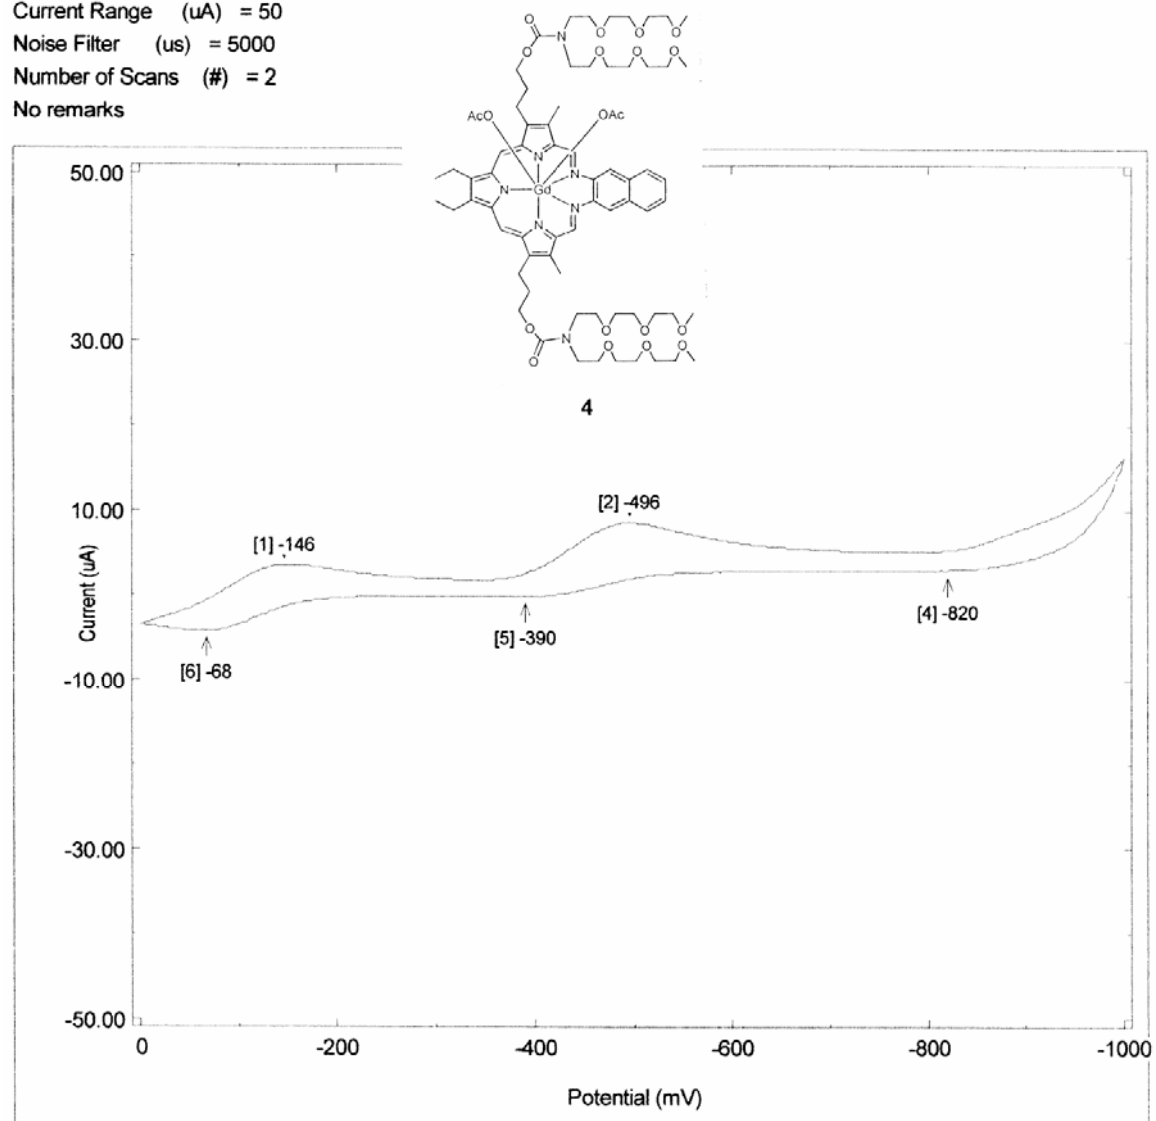

## 5) Texaphyrin 5

File Name: d:\leifu-1\lf011005\1120(3).cv4

Initial E (mV) = 0

Forward E Limit (mV) = -1100

Reverse E Limit (mV) = 0

Final E (mV) = 0

Scan Rate (mV/s) = 50

Current Range (uA) = 50

Noise Filter (us) = 5000

Number of Scans (#) = 2

No remarks

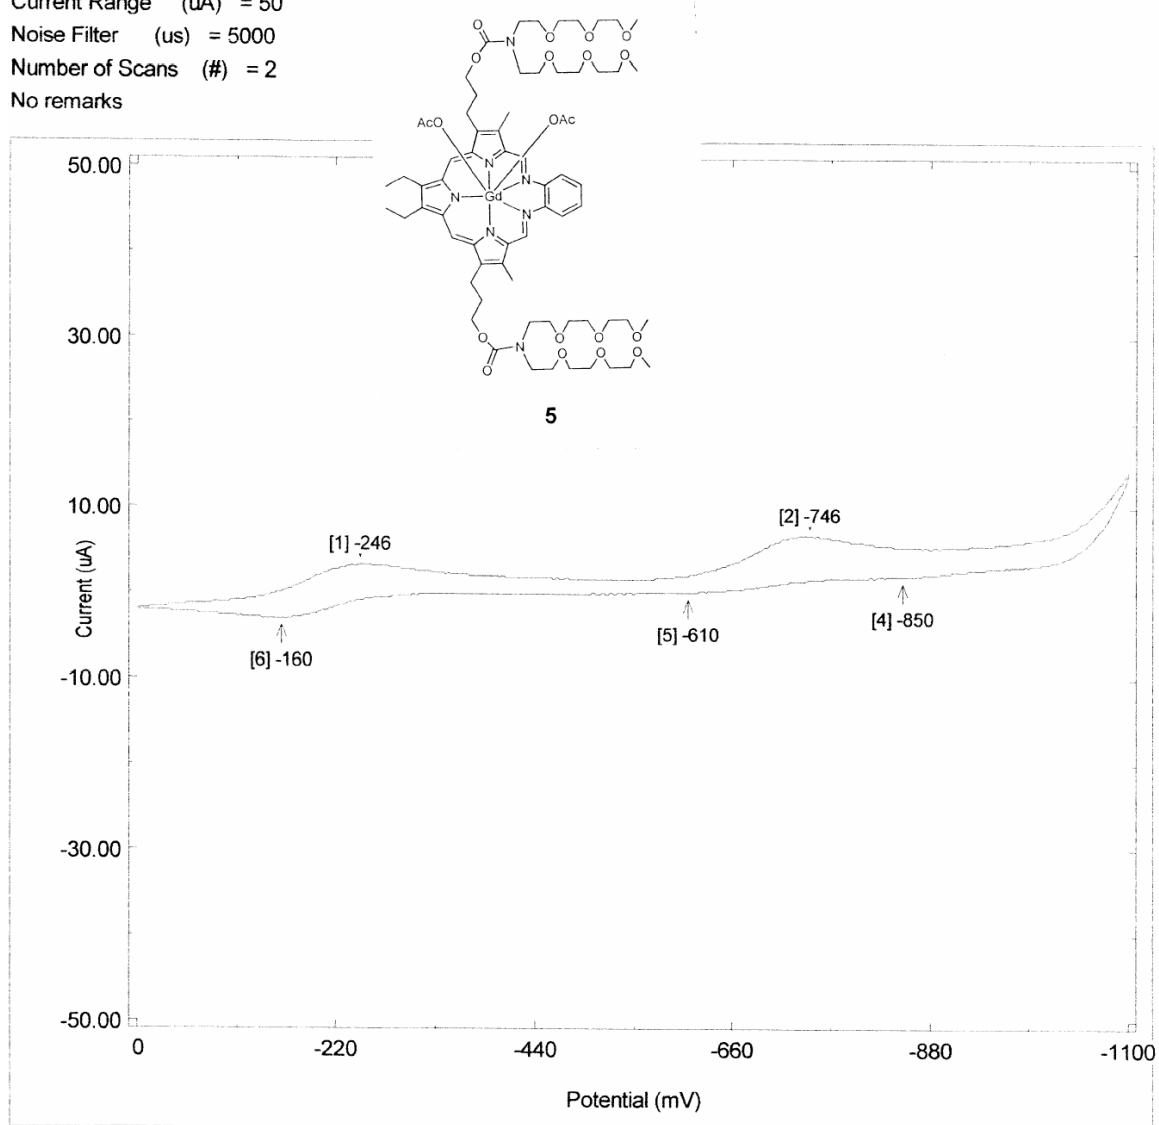

## II: X-ray experimental for 14

X-ray Experimental for  $(C_{36}H_{26}N_5O_2)Gd(NO_3)_2 - CH_3OH - \frac{1}{2} C_6H_6$ : Crystals grew as green prisms by slow evaporation from methanol-benzene. The data crystal was a prism that had approximate dimensions; 0.24 x 0.20 x 0.13 mm. The data were collected on a Nonius Kappa CCD diffractometer using a graphite monochromator with MoK $\alpha$  radiation ( $\lambda = 0.71073\text{\AA}$ ). A total of 314 frames of data were collected using  $\omega$ -scans with a scan range of  $0.9^\circ$  and a counting time of 49 seconds per frame. The data were collected at 153 K using an Oxford Cryostream low temperature device. Details of crystal data, data collection and structure refinement are listed in Table 1. Data reduction were performed using DENZO-SMN.<sup>1</sup> The structure was solved by direct methods using SIR92<sup>2</sup> and refined by full-matrix least-squares on  $F^2$  with anisotropic displacement parameters for the non-H atoms using SHELXL-97.<sup>3</sup> The hydrogen atoms on carbon were calculated in ideal positions with isotropic displacement parameters set to  $1.2xU_{eq}$  of the attached atom ( $1.5xU_{eq}$  for methyl hydrogen atoms). The hydrogen atom on the methanol oxygen atom was located in a  $\Delta F$  map and refined with an isotropic displacement parameter. A molecule of benzene was found to be disordered around a crystallographic inversion center at  $0, \frac{1}{2}, \frac{1}{2}$ . The molecule was poorly resolved and its contribution to the scattering was removed using the utility, SQUEEZE.<sup>4</sup> The function,  $\sum w(|F_o|^2 - |F_c|^2)^2$ , was minimized, where  $w = 1/[(\sigma(F_o))^2 + (0.0339*P)^2 + (1.0382*P)]$  and  $P = (|F_o|^2 + 2|F_c|^2)/3$ .  $R_w(F^2)$  refined to 0.0741, with  $R(F)$  equal to 0.0278 and a goodness of fit,  $S$ , = 1.145. Definitions used for calculating  $R(F), R_w(F^2)$  and the goodness of fit,  $S$ , are given below.<sup>5</sup> The data were checked for secondary extinction effects but no correction was necessary. Neutral atom scattering factors and values used to calculate the linear absorption coefficient are from the International Tables for X-ray Crystallography (1992).<sup>6</sup> All figures were generated using SHELXTL/PC.<sup>7</sup> Tables of positional and thermal parameters, bond lengths and angles, torsion angles, figures and lists of observed and calculated structure factors are located in tables 1 through



7.

## References

- 1) DENZO-SMN. (1997). Z. Otwinowski and W. Minor, Methods in Enzymology, **276**: Macromolecular Crystallography, part A, 307 – 326, C. W. Carter, Jr. and R. M. Sweets, Editors, Academic Press.
- 2) SIR92. (1993). A program for crystal structure solution. Altomare, A., Cascarano, G., Giacovazzo, C. & Guagliardi, A. J. Appl. Cryst. 26, 343-350.
- 3) Sheldrick, G. M. (1994). SHELXL97. Program for the Refinement of Crystal Structures. University of Gottingen, Germany.
- 4) Spek, A. L. (1998). PLATON, A Multipurpose Crystallographic Tool. Utrecht University, The Netherlands.
- 5)  $R_w(F^2) = \{\sum w(|F_o|^2 - |F_c|^2)^2 / \sum w(|F_o|^4)\}^{1/2}$  where w is the weight given each reflection.  
 $R(F) = \Sigma(|F_o| - |F_c|) / \Sigma|F_o|$  for reflections with  $F_o > 4(\sigma(F_o))$ .  
 $S = [\sum w(|F_o|^2 - |F_c|^2)^2 / (n - p)]^{1/2}$ , where n is the number of reflections and p is the number of refined parameters.
- 6) International Tables for X-ray Crystallography (1992). Vol. C, Tables 4.2.6.8 and 6.1.1.4, A. J. C. Wilson, editor, Boston: Kluwer Academic Press.
- 7) Sheldrick, G. M. (1994). SHELXTL/PC (Version 5.03). Siemens Analytical X-ray Instruments, Inc., Madison, Wisconsin, USA.

### Crystallographic Material for **1**.

#### X-ray Experimental.

Figure 1. View of **14** showing the atom labeling scheme. Displacement ellipsoids are scaled to the 50% probability level.

Figure 2. Side view of **14**. Displacement ellipsoids are scaled to the 50% probability level. The Gd<sup>3+</sup> ion is 0.698(1)Å out of the plane defined by the five nitrogen atoms of the texaphyrin macrocycle.

Figure 3. Unit cell packing diagram for **14**. The view is approximately down the **a** axis. The Gd-texaphyrin complex exists as H-bound dimers. The dimers are shown as ball-and-stick and wireframe pairs. The pairs are H-bound via the methanol hydroxyl group of one complex to a methoxy oxygen on an adjacent complex. The H-bonding geometry is: O1C-H1C<sup>⋯</sup>O34 (related by -x, -y, 1-z), O<sup>⋯</sup>O 2.791(3)Å, H<sup>⋯</sup>O 2.08(3)Å, O-H<sup>⋯</sup>O 155(3)°.

Table 1. Crystallographic Data for **14**.

Table 2. Fractional coordinates and equivalent isotropic thermal parameters (Å<sup>2</sup>) for the non-hydrogen atoms of **14**.

Table 3. Bond Lengths (Å) and Angles (°) for the non-hydrogen atoms of **14**.

Table 4. Anisotropic thermal parameters for the non-hydrogen atoms of **14**.

Table 5. Fractional coordinates and isotropic thermal parameters (Å<sup>2</sup>) for the hydrogen atoms of **14**.

Table 6. Torsion Angles (°) for the non-hydrogen atoms of **14**.

Figure 1. View of **14** showing the atom labeling scheme. Displacement ellipsoids are scaled to the 50% probability level.

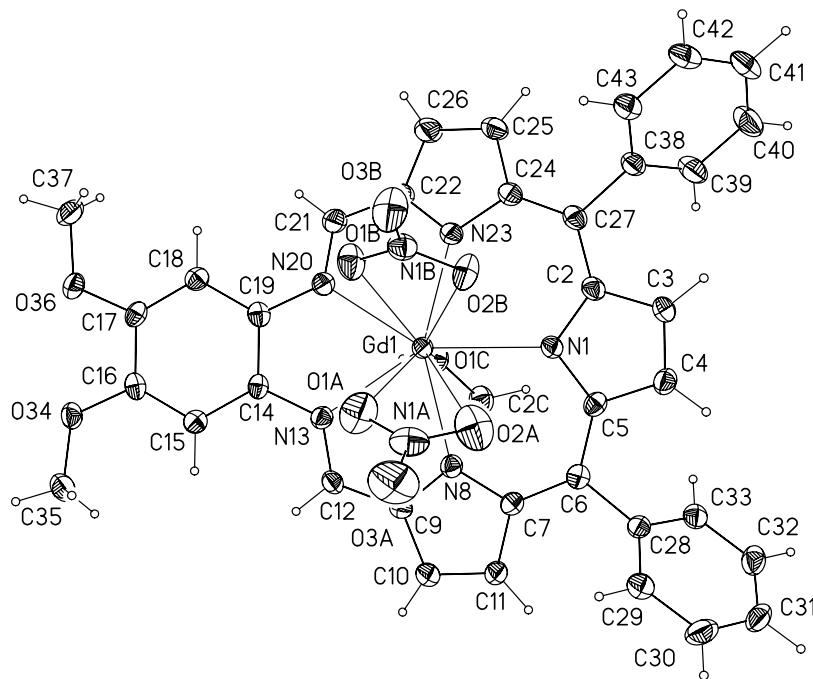

Figure 2. Side view of **14**. Displacement ellipsoids are scaled to the 50% probability level. The Gd<sup>3+</sup> ion is 0.698(1) Å out of the plane defined by the five nitrogen atoms of the texaphyrin macrocycle.

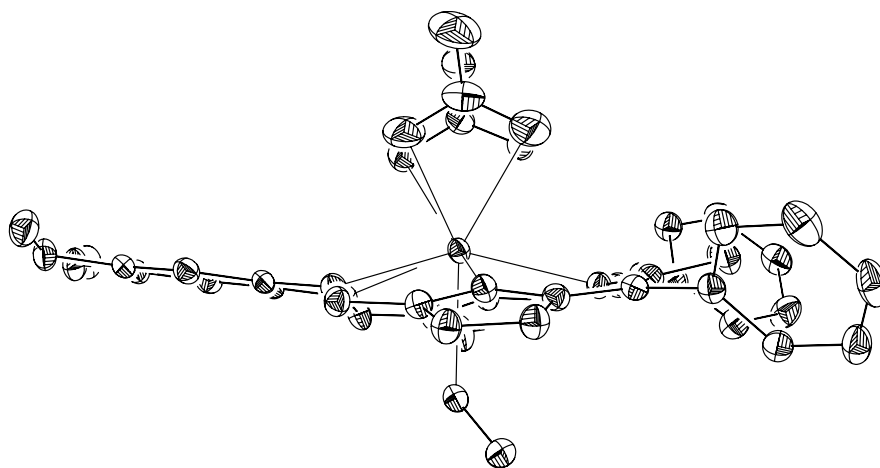

Figure 3. Unit cell packing diagram for **14**. The view is approximately down the **a** axis. The Gd-tetraphyrin complex exists as H-bonded dimers. The dimers are shown as ball-and-stick and wireframe pairs. The pairs are H-bonded via the methanol hydroxyl group of one complex to a methoxy oxygen on an adjacent complex. The H-bonding geometry is: O1C-H1C...O34 (related by  $-x, -y, 1-z$ ), O...O 2.791(3)Å, H...O 2.08(3)Å, O-H...O 155(3)°.

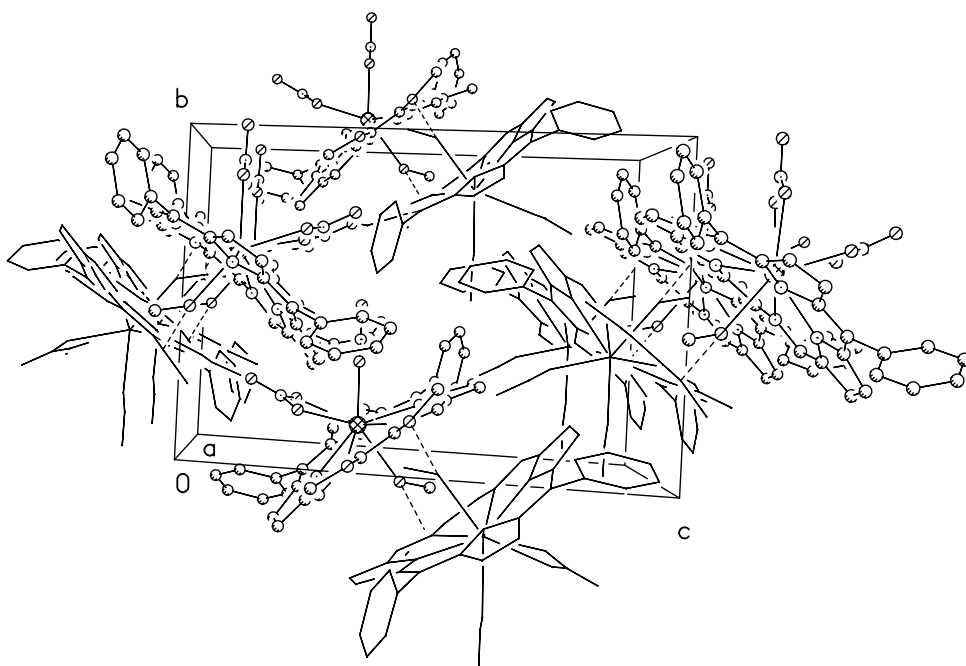

Table 1. Crystal data and structure refinement for 14.

|                                   |                                                                  |                  |
|-----------------------------------|------------------------------------------------------------------|------------------|
| Empirical formula                 | C <sub>40</sub> H <sub>33</sub> Gd N <sub>7</sub> O <sub>9</sub> |                  |
| Formula weight                    | 912.98                                                           |                  |
| Temperature                       | 153(2) K                                                         |                  |
| Wavelength                        | 0.71073 Å                                                        |                  |
| Crystal system                    | Monoclinic                                                       |                  |
| Space group                       | P21/c                                                            |                  |
| Unit cell dimensions              | a = 17.9235(2) Å                                                 | α = 90°.         |
|                                   | b = 11.9870(1) Å                                                 | β = 114.244(1)°. |
|                                   | c = 18.7840(2) Å                                                 | γ = 90°.         |
| Volume                            | 3679.79(6) Å <sup>3</sup>                                        |                  |
| Z                                 | 4                                                                |                  |
| Density (calculated)              | 1.648 Mg/m <sup>3</sup>                                          |                  |
| Absorption coefficient            | 1.871 mm <sup>-1</sup>                                           |                  |
| F(000)                            | 1832                                                             |                  |
| Crystal size                      | 0.24 x 0.20 x 0.13 mm                                            |                  |
| Theta range for data collection   | 2.92 to 27.50°.                                                  |                  |
| Index ranges                      | -23 ≤ h ≤ 23, -15 ≤ k ≤ 15, -24 ≤ l ≤ 23                         |                  |
| Reflections collected             | 14460                                                            |                  |
| Independent reflections           | 8372 [R(int) = 0.0171]                                           |                  |
| Completeness to theta = 27.50°    | 99.0 %                                                           |                  |
| Absorption correction             | None                                                             |                  |
| Refinement method                 | Full-matrix least-squares on F <sup>2</sup>                      |                  |
| Data / restraints / parameters    | 8372 / 0 / 491                                                   |                  |
| Goodness-of-fit on F <sup>2</sup> | 1.145                                                            |                  |
| Final R indices [I > 2σ(I)]       | R1 = 0.0278, wR2 = 0.0712                                        |                  |
| R indices (all data)              | R1 = 0.0362, wR2 = 0.0741                                        |                  |
| Largest diff. peak and hole       | 1.38 and -1.05 e.Å <sup>-3</sup>                                 |                  |

Table 2. Atomic coordinates ( × 10<sup>4</sup>) and equivalent isotropic displacement parameters (Å<sup>2</sup> × 10<sup>3</sup>) for 14. U(eq) is defined as one third of the trace of the orthogonalized U<sup>ij</sup> tensor.

|     | x       | y       | z       | U(eq) |
|-----|---------|---------|---------|-------|
| Gd1 | 1927(1) | 1275(1) | 3773(1) | 18(1) |

|     |          |          |         |       |
|-----|----------|----------|---------|-------|
| N1  | 3326(1)  | 911(2)   | 3857(1) | 20(1) |
| C2  | 3468(2)  | 517(2)   | 3235(1) | 22(1) |
| C3  | 4224(2)  | 965(2)   | 3266(2) | 25(1) |
| C4  | 4555(2)  | 1587(2)  | 3924(2) | 26(1) |
| C5  | 3999(2)  | 1551(2)  | 4294(1) | 20(1) |
| C6  | 4171(2)  | 2091(2)  | 5028(1) | 21(1) |
| C7  | 3636(2)  | 2216(2)  | 5391(1) | 20(1) |
| N8  | 2824(1)  | 1941(2)  | 5053(1) | 20(1) |
| C9  | 2514(2)  | 2145(2)  | 5581(1) | 20(1) |
| C10 | 3135(2)  | 2566(2)  | 6294(1) | 25(1) |
| C11 | 3833(2)  | 2615(2)  | 6183(1) | 24(1) |
| C12 | 1670(2)  | 1905(2)  | 5389(1) | 22(1) |
| N13 | 1244(1)  | 1448(2)  | 4715(1) | 21(1) |
| C14 | 420(2)   | 1190(2)  | 4452(1) | 19(1) |
| C15 | -102(2)  | 1620(2)  | 4775(1) | 21(1) |
| C16 | -914(2)  | 1316(2)  | 4469(2) | 21(1) |
| C17 | -1234(1) | 578(2)   | 3823(1) | 21(1) |
| C18 | -732(2)  | 153(2)   | 3495(1) | 22(1) |
| C19 | 104(2)   | 444(2)   | 3812(1) | 20(1) |
| N20 | 665(1)   | 64(2)    | 3528(1) | 21(1) |
| C21 | 520(2)   | -759(2)  | 3032(1) | 26(1) |
| C22 | 1130(2)  | -1000(2) | 2748(2) | 26(1) |
| N23 | 1798(1)  | -351(2)  | 2963(1) | 21(1) |
| C24 | 2245(2)  | -728(2)  | 2568(1) | 23(1) |
| C25 | 1828(2)  | -1682(2) | 2096(2) | 31(1) |
| C26 | 1140(2)  | -1850(2) | 2212(2) | 36(1) |
| C27 | 2988(2)  | -271(2)  | 2654(1) | 23(1) |
| C28 | 5010(2)  | 2565(2)  | 5432(1) | 21(1) |
| C29 | 5118(2)  | 3698(2)  | 5615(2) | 27(1) |
| C30 | 5900(2)  | 4146(3)  | 5949(2) | 37(1) |
| C31 | 6580(2)  | 3475(3)  | 6105(2) | 35(1) |
| C32 | 6479(2)  | 2352(3)  | 5946(2) | 32(1) |
| C33 | 5700(2)  | 1893(2)  | 5616(1) | 25(1) |
| O34 | -1472(1) | 1699(2)  | 4735(1) | 25(1) |
| C35 | -1247(2) | 2641(2)  | 5259(2) | 32(1) |
| O36 | -2045(1) | 375(2)   | 3566(1) | 28(1) |

|     |          |          |         |       |
|-----|----------|----------|---------|-------|
| C37 | -2423(2) | -282(2)  | 2865(2) | 32(1) |
| C38 | 3334(2)  | -644(2)  | 2089(1) | 24(1) |
| C39 | 4086(2)  | -1172(2) | 2337(2) | 34(1) |
| C40 | 4412(2)  | -1444(3) | 1799(2) | 38(1) |
| C41 | 3979(2)  | -1199(2) | 1018(2) | 34(1) |
| C42 | 3225(2)  | -686(2)  | 762(2)  | 32(1) |
| C43 | 2896(2)  | -419(2)  | 1297(2) | 29(1) |
| N1A | 1937(2)  | 3832(2)  | 3747(1) | 36(1) |
| O1A | 1377(1)  | 3187(2)  | 3735(1) | 47(1) |
| O2A | 2563(2)  | 3390(2)  | 3753(1) | 52(1) |
| O3A | 1844(2)  | 4852(2)  | 3734(1) | 61(1) |
| N1B | 1076(1)  | 2054(2)  | 2138(1) | 26(1) |
| O1B | 682(1)   | 1686(2)  | 2509(1) | 35(1) |
| O2B | 1845(1)  | 1961(2)  | 2456(1) | 33(1) |
| O3B | 723(1)   | 2514(2)  | 1509(1) | 47(1) |
| O1C | 2399(1)  | -374(2)  | 4710(1) | 25(1) |
| C2C | 3169(2)  | -556(2)  | 5365(2) | 30(1) |

Table 3. Bond lengths [ $\text{\AA}$ ] and angles [ $^\circ$ ] for 14.

|         |            |         |          |
|---------|------------|---------|----------|
| Gd1-N8  | 2.4142(19) | C3-H3   | 0.96     |
| Gd1-N23 | 2.424(2)   | C4-C5   | 1.431(4) |
| Gd1-O1A | 2.484(2)   | C4-H4   | 0.96     |
| Gd1-N1  | 2.486(2)   | C5-C6   | 1.438(3) |
| Gd1-N13 | 2.540(2)   | C6-C7   | 1.394(3) |
| Gd1-O1C | 2.5498(18) | C6-C28  | 1.492(3) |
| Gd1-O1B | 2.5500(19) | C7-N8   | 1.368(3) |
| Gd1-O2B | 2.5529(18) | C7-C11  | 1.461(3) |
| Gd1-N20 | 2.565(2)   | N8-C9   | 1.343(3) |
| Gd1-O2A | 2.786(3)   | C9-C12  | 1.434(3) |
| N1-C2   | 1.377(3)   | C9-C10  | 1.436(3) |
| N1-C5   | 1.380(3)   | C10-C11 | 1.351(3) |
| C2-C27  | 1.432(3)   | C10-H10 | 0.96     |
| C2-C3   | 1.437(3)   | C11-H11 | 0.96     |
| C3-C4   | 1.354(4)   | C12-N13 | 1.301(3) |

|            |           |             |           |
|------------|-----------|-------------|-----------|
| C12-H12    | 0.96      | C32-C33     | 1.388(4)  |
| N13-C14    | 1.387(3)  | C32-H32     | 0.96      |
| C14-C15    | 1.404(3)  | C33-H33     | 0.96      |
| C14-C19    | 1.417(3)  | O34-C35     | 1.443(3)  |
| C15-C16    | 1.377(3)  | C35-H35A    | 0.96      |
| C15-H15    | 0.96      | C35-H35B    | 0.96      |
| C16-O34    | 1.367(3)  | C35-H35C    | 0.96      |
| C16-C17    | 1.419(4)  | O36-C37     | 1.442(3)  |
| C17-O36    | 1.353(3)  | C37-H37A    | 0.96      |
| C17-C18    | 1.380(3)  | C37-H37B    | 0.96      |
| C18-C19    | 1.411(3)  | C37-H37C    | 0.96      |
| C18-H18    | 0.96      | C38-C39     | 1.387(4)  |
| C19-N20    | 1.394(3)  | C38-C43     | 1.393(4)  |
| N20-C21    | 1.307(3)  | C39-C40     | 1.397(4)  |
| C21-C22    | 1.430(4)  | C39-H39     | 0.96      |
| C21-H21    | 0.96      | C40-C41     | 1.381(4)  |
| C22-N23    | 1.344(3)  | C40-H40     | 0.96      |
| C22-C26    | 1.437(4)  | C41-C42     | 1.379(4)  |
| N23-C24    | 1.372(3)  | C41-H41     | 0.96      |
| C24-C27    | 1.387(4)  | C42-C43     | 1.395(4)  |
| C24-C25    | 1.453(4)  | C42-H42     | 0.96      |
| C25-C26    | 1.353(4)  | C43-H43     | 0.96      |
| C25-H25    | 0.96      | N1A-O3A     | 1.233(3)  |
| C26-H26    | 0.96      | N1A-O2A     | 1.236(3)  |
| C27-C38    | 1.501(3)  | N1A-O1A     | 1.260(3)  |
| C28-C33    | 1.394(4)  | N1B-O3B     | 1.220(3)  |
| C28-C29    | 1.396(3)  | N1B-O1B     | 1.257(3)  |
| C29-C30    | 1.387(4)  | N1B-O2B     | 1.263(3)  |
| C29-H29    | 0.96      | O1C-C2C     | 1.439(3)  |
| C30-C31    | 1.388(4)  | O1C-H1C     | 0.76(3)   |
| C30-H30    | 0.96      | C2C-H2CC    | 0.96      |
| C31-C32    | 1.374(4)  | C2C-H2CA    | 0.96      |
| C31-H31    | 0.96      | C2C-H2CB    | 0.96      |
| N8-Gd1-N23 | 138.00(7) | N23-Gd1-O1A | 142.16(7) |
| N8-Gd1-O1A | 79.48(7)  | N8-Gd1-N1   | 75.68(6)  |

|             |           |             |            |
|-------------|-----------|-------------|------------|
| N23-Gd1-N1  | 74.46(7)  | N13-Gd1-O2A | 104.60(7)  |
| O1A-Gd1-N1  | 122.79(7) | O1C-Gd1-O2A | 133.85(6)  |
| N8-Gd1-N13  | 66.02(7)  | O1B-Gd1-O2A | 91.07(7)   |
| N23-Gd1-N13 | 123.63(7) | O2B-Gd1-O2A | 63.59(7)   |
| O1A-Gd1-N13 | 69.26(7)  | N20-Gd1-O2A | 148.02(7)  |
| N1-Gd1-N13  | 137.06(6) | C2-N1-C5    | 106.0(2)   |
| N8-Gd1-O1C  | 70.85(6)  | C2-N1-Gd1   | 122.64(15) |
| N23-Gd1-O1C | 74.26(6)  | C5-N1-Gd1   | 123.56(16) |
| O1A-Gd1-O1C | 138.61(7) | N1-C2-C27   | 127.6(2)   |
| N1-Gd1-O1C  | 77.29(6)  | N1-C2-C3    | 109.7(2)   |
| N13-Gd1-O1C | 72.54(6)  | C27-C2-C3   | 122.6(2)   |
| N8-Gd1-O1B  | 146.48(7) | C4-C3-C2    | 107.1(2)   |
| N23-Gd1-O1B | 75.51(7)  | C4-C3-H3    | 126.6      |
| O1A-Gd1-O1B | 67.09(7)  | C2-C3-H3    | 126.3      |
| N1-Gd1-O1B  | 124.52(6) | C3-C4-C5    | 107.2(2)   |
| N13-Gd1-O1B | 98.38(6)  | C3-C4-H4    | 126.7      |
| O1C-Gd1-O1B | 135.06(6) | C5-C4-H4    | 126.1      |
| N8-Gd1-O2B  | 127.45(6) | N1-C5-C4    | 109.9(2)   |
| N23-Gd1-O2B | 72.44(6)  | N1-C5-C6    | 127.7(2)   |
| O1A-Gd1-O2B | 79.12(7)  | C4-C5-C6    | 122.4(2)   |
| N1-Gd1-O2B  | 76.86(6)  | C7-C6-C5    | 126.7(2)   |
| N13-Gd1-O2B | 142.83(6) | C7-C6-C28   | 117.6(2)   |
| O1C-Gd1-O2B | 142.13(6) | C5-C6-C28   | 115.6(2)   |
| O1B-Gd1-O2B | 49.90(6)  | N8-C7-C6    | 124.1(2)   |
| N8-Gd1-N20  | 122.94(6) | N8-C7-C11   | 108.6(2)   |
| N23-Gd1-N20 | 65.33(6)  | C6-C7-C11   | 127.3(2)   |
| O1A-Gd1-N20 | 101.96(7) | C9-N8-C7    | 107.23(19) |
| N1-Gd1-N20  | 134.76(7) | C9-N8-Gd1   | 119.16(15) |
| N13-Gd1-N20 | 61.96(6)  | C7-N8-Gd1   | 133.57(15) |
| O1C-Gd1-N20 | 72.74(6)  | N8-C9-C12   | 119.5(2)   |
| O1B-Gd1-N20 | 64.69(6)  | N8-C9-C10   | 110.8(2)   |
| O2B-Gd1-N20 | 108.23(6) | C12-C9-C10  | 129.7(2)   |
| N8-Gd1-O2A  | 66.63(7)  | C11-C10-C9  | 106.5(2)   |
| N23-Gd1-O2A | 131.09(7) | C11-C10-H10 | 126.9      |
| O1A-Gd1-O2A | 47.15(8)  | C9-C10-H10  | 126.6      |
| N1-Gd1-O2A  | 75.68(7)  | C10-C11-C7  | 106.9(2)   |



|             |            |               |            |
|-------------|------------|---------------|------------|
| C10-C11-H11 | 126.6      | C22-N23-Gd1   | 119.85(16) |
| C7-C11-H11  | 126.5      | C24-N23-Gd1   | 132.70(16) |
| N13-C12-C9  | 117.7(2)   | N23-C24-C27   | 123.5(2)   |
| N13-C12-H12 | 120.9      | N23-C24-C25   | 108.8(2)   |
| C9-C12-H12  | 121.3      | C27-C24-C25   | 127.6(2)   |
| C12-N13-C14 | 123.6(2)   | C26-C25-C24   | 107.0(2)   |
| C12-N13-Gd1 | 117.05(16) | C26-C25-H25   | 125.8      |
| C14-N13-Gd1 | 118.77(15) | C24-C25-H25   | 127.2      |
| N13-C14-C15 | 124.4(2)   | C25-C26-C22   | 106.4(2)   |
| N13-C14-C19 | 116.0(2)   | C25-C26-H26   | 127.2      |
| C15-C14-C19 | 119.6(2)   | C22-C26-H26   | 126.4      |
| C16-C15-C14 | 120.0(2)   | C24-C27-C2    | 126.7(2)   |
| C16-C15-H15 | 120.2      | C24-C27-C38   | 117.1(2)   |
| C14-C15-H15 | 119.8      | C2-C27-C38    | 116.2(2)   |
| O34-C16-C15 | 124.5(2)   | C33-C28-C29   | 118.8(2)   |
| O34-C16-C17 | 115.0(2)   | C33-C28-C6    | 120.9(2)   |
| C15-C16-C17 | 120.5(2)   | C29-C28-C6    | 120.3(2)   |
| O36-C17-C18 | 125.1(2)   | C30-C29-C28   | 120.0(3)   |
| O36-C17-C16 | 114.5(2)   | C30-C29-H29   | 120.4      |
| C18-C17-C16 | 120.3(2)   | C28-C29-H29   | 119.6      |
| C17-C18-C19 | 119.6(2)   | C29-C30-C31   | 120.5(3)   |
| C17-C18-H18 | 120.2      | C29-C30-H30   | 119.8      |
| C19-C18-H18 | 120.1      | C31-C30-H30   | 119.6      |
| N20-C19-C18 | 124.4(2)   | C32-C31-C30   | 119.7(3)   |
| N20-C19-C14 | 115.6(2)   | C32-C31-H31   | 120.3      |
| C18-C19-C14 | 119.9(2)   | C30-C31-H31   | 120.0      |
| C21-N20-C19 | 123.8(2)   | C31-C32-C33   | 120.3(3)   |
| C21-N20-Gd1 | 117.26(16) | C31-C32-H32   | 119.9      |
| C19-N20-Gd1 | 117.86(15) | C33-C32-H32   | 119.8      |
| N20-C21-C22 | 117.4(2)   | C32-C33-C28   | 120.6(3)   |
| N20-C21-H21 | 121.0      | C32-C33-H33   | 120.1      |
| C22-C21-H21 | 121.6      | C28-C33-H33   | 119.3      |
| N23-C22-C21 | 119.6(2)   | C16-O34-C35   | 118.1(2)   |
| N23-C22-C26 | 110.8(2)   | O34-C35-H35A  | 109.0      |
| C21-C22-C26 | 129.5(2)   | O34-C35-H35B  | 109.5      |
| C22-N23-C24 | 107.0(2)   | H35A-C35-H35B | 109.5      |

|               |          |               |            |
|---------------|----------|---------------|------------|
| O34-C35-H35C  | 109.9    | C38-C43-C42   | 120.4(3)   |
| H35A-C35-H35C | 109.5    | C38-C43-H43   | 119.7      |
| H35B-C35-H35C | 109.5    | C42-C43-H43   | 119.9      |
| C17-O36-C37   | 117.3(2) | O3A-N1A-O2A   | 122.7(3)   |
| O36-C37-H37A  | 109.4    | O3A-N1A-O1A   | 120.5(3)   |
| O36-C37-H37B  | 109.6    | O2A-N1A-O1A   | 116.8(3)   |
| H37A-C37-H37B | 109.5    | N1A-O1A-Gd1   | 105.19(18) |
| O36-C37-H37C  | 109.5    | N1A-O2A-Gd1   | 90.85(18)  |
| H37A-C37-H37C | 109.5    | O3B-N1B-O1B   | 120.7(2)   |
| H37B-C37-H37C | 109.5    | O3B-N1B-O2B   | 121.9(2)   |
| C39-C38-C43   | 119.4(2) | O1B-N1B-O2B   | 117.3(2)   |
| C39-C38-C27   | 121.7(2) | O3B-N1B-Gd1   | 171.19(19) |
| C43-C38-C27   | 118.9(2) | O1B-N1B-Gd1   | 58.83(12)  |
| C38-C39-C40   | 120.1(3) | O2B-N1B-Gd1   | 58.99(12)  |
| C38-C39-H39   | 119.7    | N1B-O1B-Gd1   | 96.22(14)  |
| C40-C39-H39   | 120.1    | N1B-O2B-Gd1   | 95.92(14)  |
| C41-C40-C39   | 120.0(3) | C2C-O1C-Gd1   | 129.60(16) |
| C41-C40-H40   | 120.1    | C2C-O1C-H1C   | 109(3)     |
| C39-C40-H40   | 119.9    | Gd1-O1C-H1C   | 111(3)     |
| C42-C41-C40   | 120.5(3) | O1C-C2C-H2CC  | 109.6      |
| C42-C41-H41   | 119.8    | O1C-C2C-H2CA  | 109.8      |
| C40-C41-H41   | 119.8    | H2CC-C2C-H2CA | 109.7      |
| C41-C42-C43   | 119.7(3) | O1C-C2C-H2CB  | 109.8      |
| C41-C42-H42   | 119.9    | H2CC-C2C-H2CB | 109.7      |
| C43-C42-H42   | 120.4    | H2CA-C2C-H2CB | 108.2      |

Table 4. Anisotropic displacement parameters ( $\text{\AA}^2 \times 10^3$ ) for 1. The anisotropic displacement factor exponent takes the form:  $-2\pi^2 [ h^2 a^{*2} U^{11} + \dots + 2 h k a^* b^* U^{12} ]$

|     | U <sup>11</sup> | U <sup>22</sup> | U <sup>33</sup> | U <sup>23</sup> | U <sup>13</sup> | U <sup>12</sup> |
|-----|-----------------|-----------------|-----------------|-----------------|-----------------|-----------------|
| Gd1 | 17(1)           | 21(1)           | 15(1)           | 0(1)            | 8(1)            | -2(1)           |
| N1  | 19(1)           | 24(1)           | 17(1)           | 0(1)            | 8(1)            | 0(1)            |
| C2  | 23(1)           | 26(1)           | 17(1)           | 1(1)            | 10(1)           | 1(1)            |
| C3  | 25(1)           | 33(1)           | 22(1)           | -2(1)           | 14(1)           | -4(1)           |
| C4  | 21(1)           | 33(1)           | 23(1)           | 1(1)            | 10(1)           | -5(1)           |

|     |       |       |       |        |       |        |
|-----|-------|-------|-------|--------|-------|--------|
| C5  | 20(1) | 22(1) | 19(1) | 2(1)   | 7(1)  | -2(1)  |
| C6  | 21(1) | 20(1) | 21(1) | 3(1)   | 9(1)  | 0(1)   |
| C7  | 20(1) | 20(1) | 20(1) | 0(1)   | 8(1)  | -1(1)  |
| N8  | 20(1) | 23(1) | 20(1) | 0(1)   | 9(1)  | -1(1)  |
| C9  | 21(1) | 21(1) | 19(1) | -2(1)  | 9(1)  | -1(1)  |
| C10 | 25(1) | 29(2) | 22(1) | -4(1)  | 11(1) | 0(1)   |
| C11 | 20(1) | 30(1) | 21(1) | -4(1)  | 7(1)  | -2(1)  |
| C12 | 22(1) | 26(1) | 22(1) | -1(1)  | 12(1) | 2(1)   |
| N13 | 19(1) | 22(1) | 20(1) | 0(1)   | 8(1)  | -1(1)  |
| C14 | 17(1) | 22(1) | 19(1) | 5(1)   | 9(1)  | 0(1)   |
| C15 | 22(1) | 23(1) | 19(1) | 2(1)   | 9(1)  | -1(1)  |
| C16 | 21(1) | 23(1) | 23(1) | 7(1)   | 13(1) | 3(1)   |
| C17 | 17(1) | 24(1) | 21(1) | 5(1)   | 7(1)  | -2(1)  |
| C18 | 22(1) | 23(1) | 20(1) | 2(1)   | 7(1)  | -1(1)  |
| C19 | 22(1) | 23(1) | 18(1) | 6(1)   | 11(1) | 2(1)   |
| N20 | 21(1) | 23(1) | 20(1) | 0(1)   | 9(1)  | -2(1)  |
| C21 | 25(1) | 29(1) | 27(1) | -5(1)  | 14(1) | -9(1)  |
| C22 | 27(1) | 28(1) | 26(1) | -6(1)  | 14(1) | -8(1)  |
| N23 | 21(1) | 24(1) | 19(1) | -1(1)  | 9(1)  | -1(1)  |
| C24 | 25(1) | 27(1) | 19(1) | 0(1)   | 10(1) | -1(1)  |
| C25 | 34(2) | 32(1) | 31(2) | -13(1) | 19(1) | -7(1)  |
| C26 | 38(2) | 35(2) | 41(2) | -16(1) | 22(1) | -14(1) |
| C27 | 25(1) | 25(1) | 19(1) | 2(1)   | 11(1) | 2(1)   |
| C28 | 21(1) | 28(1) | 15(1) | 0(1)   | 7(1)  | -2(1)  |
| C29 | 28(1) | 30(2) | 26(1) | -3(1)  | 13(1) | -2(1)  |
| C30 | 41(2) | 38(2) | 33(2) | -10(1) | 15(1) | -18(1) |
| C31 | 25(1) | 57(2) | 23(1) | -7(1)  | 9(1)  | -17(1) |
| C32 | 21(1) | 51(2) | 22(1) | 2(1)   | 8(1)  | -2(1)  |
| C33 | 24(1) | 33(2) | 18(1) | 2(1)   | 8(1)  | 1(1)   |
| O34 | 21(1) | 28(1) | 30(1) | -1(1)  | 15(1) | -1(1)  |
| C35 | 31(2) | 30(1) | 41(2) | -5(1)  | 20(1) | 1(1)   |
| O36 | 17(1) | 37(1) | 29(1) | -2(1)  | 9(1)  | -3(1)  |
| C37 | 22(1) | 46(2) | 25(1) | -2(1)  | 5(1)  | -5(1)  |
| C38 | 29(1) | 25(1) | 23(1) | -5(1)  | 16(1) | -5(1)  |
| C39 | 37(2) | 43(2) | 25(2) | 0(1)   | 16(1) | 9(1)   |
| C40 | 39(2) | 46(2) | 34(2) | -1(1)  | 21(1) | 15(1)  |
| C41 | 48(2) | 36(2) | 30(2) | -5(1)  | 27(1) | 0(1)   |

|     |       |       |       |       |       |       |
|-----|-------|-------|-------|-------|-------|-------|
| C42 | 43(2) | 36(2) | 21(1) | -3(1) | 16(1) | -1(1) |
| C43 | 31(1) | 33(2) | 25(1) | -2(1) | 13(1) | 0(1)  |
| N1A | 49(2) | 27(1) | 27(2) | 2(1)  | 11(1) | 0(1)  |
| O1A | 46(1) | 24(1) | 68(2) | 8(1)  | 19(1) | -2(1) |
| O2A | 59(2) | 57(1) | 48(1) | 19(1) | 29(1) | 13(1) |
| O3A | 87(2) | 25(1) | 78(2) | 0(1)  | 42(2) | -7(1) |
| N1B | 30(1) | 29(1) | 21(1) | 2(1)  | 11(1) | 0(1)  |
| O1B | 31(1) | 50(1) | 29(1) | 14(1) | 17(1) | 6(1)  |
| O2B | 21(1) | 40(1) | 35(1) | 11(1) | 10(1) | 0(1)  |
| O3B | 36(1) | 72(2) | 30(1) | 28(1) | 11(1) | 11(1) |
| O1C | 22(1) | 29(1) | 27(1) | 5(1)  | 12(1) | 0(1)  |
| C2C | 27(1) | 34(2) | 30(1) | 6(1)  | 12(1) | 5(1)  |

Table 5. Hydrogen coordinates ( $\times 10^4$ ) and isotropic displacement parameters ( $\text{\AA}^2 \times 10^3$ ) for 14.

|      | x     | y     | z    | U(eq) |
|------|-------|-------|------|-------|
| H3   | 4451  | 845   | 2889 | 30    |
| H4   | 5065  | 1981  | 4109 | 31    |
| H10  | 3067  | 2765  | 6758 | 30    |
| H11  | 4358  | 2868  | 6553 | 29    |
| H12  | 1425  | 2077  | 5744 | 27    |
| H15  | 109   | 2129  | 5207 | 25    |
| H18  | -949  | -344  | 3056 | 26    |
| H21  | 20    | -1178 | 2863 | 31    |
| H25  | 2001  | -2119 | 1762 | 37    |
| H26  | 735   | -2420 | 1984 | 43    |
| H29  | 4649  | 4162  | 5513 | 33    |
| H30  | 5972  | 4927  | 6070 | 45    |
| H31  | 7119  | 3795  | 6323 | 42    |
| H32  | 6949  | 1882  | 6065 | 38    |
| H33  | 5631  | 1108  | 5508 | 30    |
| H35A | -1692 | 2812  | 5401 | 48    |
| H35B | -769  | 2460  | 5720 | 48    |
| H35C | -1134 | 3276  | 5008 | 48    |
| H37A | -2995 | -366  | 2742 | 49    |

|      |          |          |          |        |
|------|----------|----------|----------|--------|
| H37B | -2357    | 86       | 2441     | 49     |
| H37C | -2170    | -1004    | 2946     | 49     |
| H39  | 4389     | -1333    | 2881     | 41     |
| H40  | 4930     | -1819    | 1972     | 46     |
| H41  | 4209     | -1374    | 651      | 41     |
| H42  | 2927     | -522     | 217      | 39     |
| H43  | 2366     | -78      | 1120     | 35     |
| H2CC | 3584     | -104     | 5309     | 45     |
| H2CA | 3318     | -1329    | 5390     | 45     |
| H2CB | 3121     | -366     | 5841     | 45     |
| H1C  | 2050(20) | -570(30) | 4818(19) | 45(11) |

Table 6. Torsion angles [ $^{\circ}$ ] for the macrocycle in 14.

|               |           |                 |           |
|---------------|-----------|-----------------|-----------|
| C5-N1-C2-C27  | 173.5(2)  | N8-C9-C10-C11   | 0.1(3)    |
| C5-N1-C2-C3   | -2.9(3)   | C12-C9-C10-C11  | 178.3(3)  |
| N1-C2-C3-C4   | 2.7(3)    | C9-C10-C11-C7   | -0.1(3)   |
| C27-C2-C3-C4  | -173.9(2) | N8-C7-C11-C10   | 0.0(3)    |
| C2-C3-C4-C5   | -1.3(3)   | C6-C7-C11-C10   | -178.2(2) |
| C2-N1-C5-C4   | 2.1(3)    | N8-C9-C12-N13   | 3.0(3)    |
| C2-N1-C5-C6   | -175.9(2) | C10-C9-C12-N13  | -175.0(2) |
| C3-C4-C5-N1   | -0.4(3)   | C9-C12-N13-C14  | -178.9(2) |
| C3-C4-C5-C6   | 177.7(2)  | C12-N13-C14-C15 | 16.3(4)   |
| N1-C5-C6-C7   | -10.2(4)  | C12-N13-C14-C19 | -164.0(2) |
| C4-C5-C6-C7   | 172.0(2)  | N13-C14-C15-C16 | 179.7(2)  |
| N1-C5-C6-C28  | 170.0(2)  | C19-C14-C15-C16 | 0.1(3)    |
| C4-C5-C6-C28  | -7.8(3)   | C14-C15-C16-O34 | -179.2(2) |
| C5-C6-C7-N8   | -7.6(4)   | C14-C15-C16-C17 | -0.7(4)   |
| C28-C6-C7-N8  | 172.2(2)  | O34-C16-C17-O36 | 0.6(3)    |
| C5-C6-C7-C11  | 170.4(2)  | C15-C16-C17-O36 | -178.1(2) |
| C28-C6-C7-C11 | -9.8(4)   | O34-C16-C17-C18 | 178.8(2)  |
| C6-C7-N8-C9   | 178.3(2)  | C15-C16-C17-C18 | 0.2(4)    |
| C11-C7-N8-C9  | 0.0(3)    | O36-C17-C18-C19 | 179.0(2)  |
| C7-N8-C9-C12  | -178.5(2) | C16-C17-C18-C19 | 0.9(4)    |
| C7-N8-C9-C10  | -0.1(3)   | C17-C18-C19-N20 | 180.0(2)  |

|                 |           |                 |           |
|-----------------|-----------|-----------------|-----------|
| C17-C18-C19-C14 | -1.5(3)   | C31-C32-C33-C28 | 0.8(4)    |
| N13-C14-C19-N20 | 0.0(3)    | C29-C28-C33-C32 | -2.6(4)   |
| C15-C14-C19-N20 | 179.7(2)  | C6-C28-C33-C32  | 175.8(2)  |
| N13-C14-C19-C18 | -178.6(2) | C15-C16-O34-C35 | 13.0(3)   |
| C15-C14-C19-C18 | 1.0(3)    | C17-C16-O34-C35 | -165.6(2) |
| C18-C19-N20-C21 | -13.2(4)  | C18-C17-O36-C37 | -4.0(3)   |
| C14-C19-N20-C21 | 168.2(2)  | C16-C17-O36-C37 | 174.2(2)  |
| C19-N20-C21-C22 | 175.4(2)  | C24-C27-C38-C39 | -119.6(3) |
| N20-C21-C22-N23 | -3.3(4)   | C2-C27-C38-C39  | 59.7(3)   |
| N20-C21-C22-C26 | 179.4(3)  | C24-C27-C38-C43 | 62.5(3)   |
| C21-C22-N23-C24 | -176.2(2) | C2-C27-C38-C43  | -118.2(3) |
| C26-C22-N23-C24 | 1.6(3)    | C43-C38-C39-C40 | 2.0(4)    |
| C22-N23-C24-C27 | -178.8(2) | C27-C38-C39-C40 | -175.9(3) |
| C22-N23-C24-C25 | -1.3(3)   | C38-C39-C40-C41 | -0.8(5)   |
| N23-C24-C25-C26 | 0.5(3)    | C39-C40-C41-C42 | 0.0(5)    |
| C27-C24-C25-C26 | 177.9(3)  | C40-C41-C42-C43 | -0.3(4)   |
| C24-C25-C26-C22 | 0.4(3)    | C39-C38-C43-C42 | -2.3(4)   |
| N23-C22-C26-C25 | -1.3(3)   | C27-C38-C43-C42 | 175.7(2)  |
| C21-C22-C26-C25 | 176.3(3)  | C41-C42-C43-C38 | 1.5(4)    |
| N23-C24-C27-C2  | 10.6(4)   |                 |           |
| C25-C24-C27-C2  | -166.4(3) |                 |           |
| N23-C24-C27-C38 | -170.1(2) |                 |           |
| C25-C24-C27-C38 | 12.8(4)   |                 |           |
| N1-C2-C27-C24   | 5.5(4)    |                 |           |
| C3-C2-C27-C24   | -178.5(2) |                 |           |
| N1-C2-C27-C38   | -173.8(2) |                 |           |
| C3-C2-C27-C38   | 2.2(4)    |                 |           |
| C7-C6-C28-C33   | 123.5(3)  |                 |           |
| C5-C6-C28-C33   | -56.6(3)  |                 |           |
| C7-C6-C28-C29   | -58.0(3)  |                 |           |
| C5-C6-C28-C29   | 121.8(3)  |                 |           |
| C33-C28-C29-C30 | 2.2(4)    |                 |           |
| C6-C28-C29-C30  | -176.2(2) |                 |           |
| C28-C29-C30-C31 | 0.0(4)    |                 |           |
| C29-C30-C31-C32 | -1.8(4)   |                 |           |
| C30-C31-C32-C33 | 1.4(4)    |                 |           |

```

data_gdtx

_audit_creation_method          SHELXL-97
_chemical_name_systematic
;
?
;
_chemical_formula_sum
'C40 H35 Gd N7 O9'
_chemical_formula_weight       915.00

loop_
_atom_type_symbol
_atom_type_description
_atom_type_scatter_dispersion_real
_atom_type_scatter_dispersion_imag
_atom_type_scatter_source
'C' 'C' 0.0033 0.0016
'International Tables Vol C Tables 4.2.6.8 and 6.1.1.4'
'H' 'H' 0.0000 0.0000
'International Tables Vol C Tables 4.2.6.8 and 6.1.1.4'
'N' 'N' 0.0061 0.0033
'International Tables Vol C Tables 4.2.6.8 and 6.1.1.4'
'O' 'O' 0.0106 0.0060
'International Tables Vol C Tables 4.2.6.8 and 6.1.1.4'
'Gd' 'Gd' -0.1653 3.9035
'International Tables Vol C Tables 4.2.6.8 and 6.1.1.4'

_symmetry_cell_setting          Monoclinic
_symmetry_space_group_name_H-M P21/c

loop_
_symmetry_equiv_pos_as_xyz
'x, y, z'
'-x, y+1/2, -z+1/2'
'-x, -y, -z'
'x, -y-1/2, z-1/2'

_cell_length_a                  17.9235(2)
_cell_length_b                  11.9870(1)
_cell_length_c                  18.7840(2)
_cell_angle_alpha               90.00
_cell_angle_beta                114.244(1)
_cell_angle_gamma               90.00
_cell_volume                    3679.79(6)
_cell_formula_units_Z           4
_cell_measurement_temperature   153(2)

_exptl_crystal_description      prisms
_exptl_crystal_colour           green
_exptl_crystal_size_max         0.24
_exptl_crystal_size_mid         0.20
_exptl_crystal_size_min         0.13
_exptl_crystal_density_meas     ?
_exptl_crystal_density_diffn    1.652
_exptl_crystal_density_method   'not measured'
_exptl_crystal_F_000            1840
_exptl_absorpt_coefficient_mu   1.871
_exptl_absorpt_correction_type  none
_exptl_special_details

```

```

_diffrn_ambient_temperature      153(2)
_diffrn_radiation_wavelength     0.71073
_diffrn_radiation_type           MoK\alpha
_diffrn_radiation_source         'fine-focus sealed tube'
_diffrn_radiation_monochromator  graphite
_diffrn_measurement_device_type  'Nonius Kappa CCD'
_diffrn_measurement_method       \w-scans
_diffrn_detector_area_resol_mean ?
_diffrn_standards_number         ?
_diffrn_standards_interval_count ?
_diffrn_standards_interval_time  ?
_diffrn_standards_decay_%       ?
_diffrn_reflns_number            14460
_diffrn_reflns_av_R_equivalents  0.0171
_diffrn_reflns_av_sigmaI/netI    0.0383
_diffrn_reflns_limit_h_min       -23
_diffrn_reflns_limit_h_max       23
_diffrn_reflns_limit_k_min       -15
_diffrn_reflns_limit_k_max       15
_diffrn_reflns_limit_l_min       -24
_diffrn_reflns_limit_l_max       23
_diffrn_reflns_theta_min         2.92
_diffrn_reflns_theta_max         27.50
_reflns_number_total             8372
_reflns_number_gt                6989
_reflns_threshold_expression     >2sigma(I)
_computing_structure_solution    'SHELXS-97 (Sheldrick, 1990)'
_computing_structure_refinement  'SHELXL-97 (Sheldrick, 1997)'
_computing_molecular_graphics   ?
_computing_publication_material ?

_refine_special_details
;
Refinement of F^2^ against ALL reflections. The weighted R-factor wR
and
goodness of fit S are based on F^2^, conventional R-factors R are based
on F, with F set to zero for negative F^2^. The threshold expression of
F^2^ > 2sigma(F^2^) is used only for calculating R-factors(gt) etc. and
is
not relevant to the choice of reflections for refinement. R-factors
based
on F^2^ are statistically about twice as large as those based on F, and
R-
factors based on ALL data will be even larger.
;

_refine_ls_structure_factor_coef  Fsqd
_refine_ls_matrix_type           full
_refine_ls_weighting_scheme       calc
_refine_ls_weighting_details
'calc w=1/[\s^2^(Fo^2^)+(0.0339P)^2^+1.0382P] where P=(Fo^2^+2Fc^2^)/3'
_atom_sites_solution_primary     direct
_atom_sites_solution_secondary   difmap
_atom_sites_solution_hydrogens   geom
_refine_ls_hydrogen_treatment    mixed
_refine_ls_extinction_method     none
_refine_ls_extinction_coef       ?
_refine_ls_number_reflns         8372
_refine_ls_number_parameters     491

```



```

_refine_ls_number_restraints      0
_refine_ls_R_factor_all           0.0362
_refine_ls_R_factor_gt            0.0278
_refine_ls_wR_factor_ref          0.0741
_refine_ls_wR_factor_gt          0.0712
_refine_ls_goodness_of_fit_ref    1.145
_refine_ls_restrained_S_all       1.145
_refine_ls_shift/su_max           0.001
_refine_ls_shift/su_mean          0.000

```

```
loop_
```

```

_atom_site_label
_atom_site_type_symbol
_atom_site_fract_x
_atom_site_fract_y
_atom_site_fract_z
_atom_site_U_iso_or_equiv
_atom_site_adp_type
_atom_site_occupancy
_atom_site_symmetry_multiplicity
_atom_site_calc_flag
_atom_site_refinement_flags
_atom_site_disorder_assembly
_atom_site_disorder_group
Gd1 Gd 0.192661(7) 0.127545(9) 0.377274(6) 0.01767(5) Uani 1 1 d . . .
N1 N 0.33259(12) 0.09114(18) 0.38567(11) 0.0200(4) Uani 1 1 d . . .
C2 C 0.34678(15) 0.0517(2) 0.32347(13) 0.0215(5) Uani 1 1 d . . .
C3 C 0.42240(16) 0.0965(2) 0.32655(15) 0.0254(5) Uani 1 1 d . . .
H3 H 0.4451 0.0845 0.2889 0.030 Uiso 1 1 d R . .
C4 C 0.45545(16) 0.1587(2) 0.39236(15) 0.0256(6) Uani 1 1 d . . .
H4 H 0.5065 0.1981 0.4109 0.031 Uiso 1 1 d R . .
C5 C 0.39989(15) 0.1551(2) 0.42941(14) 0.0204(5) Uani 1 1 d . . .
C6 C 0.41706(15) 0.2091(2) 0.50282(13) 0.0207(5) Uani 1 1 d . . .
C7 C 0.36359(15) 0.2216(2) 0.53912(13) 0.0200(5) Uani 1 1 d . . .
N8 N 0.28241(12) 0.19411(16) 0.50527(11) 0.0203(4) Uani 1 1 d . . .
C9 C 0.25144(15) 0.2145(2) 0.55806(13) 0.0201(5) Uani 1 1 d . . .
C10 C 0.31353(15) 0.2566(2) 0.62935(14) 0.0247(6) Uani 1 1 d . . .
H10 H 0.3067 0.2765 0.6758 0.030 Uiso 1 1 d R . .
C11 C 0.38332(16) 0.2615(2) 0.61831(14) 0.0241(5) Uani 1 1 d . . .
H11 H 0.4358 0.2868 0.6553 0.029 Uiso 1 1 d R . .
C12 C 0.16700(15) 0.1905(2) 0.53892(14) 0.0221(5) Uani 1 1 d . . .
H12 H 0.1425 0.2077 0.5744 0.027 Uiso 1 1 d R . .
N13 N 0.12443(13) 0.14479(16) 0.47152(12) 0.0205(4) Uani 1 1 d . . .
C14 C 0.04198(15) 0.11898(19) 0.44524(14) 0.0188(5) Uani 1 1 d . . .
C15 C -0.01019(15) 0.1620(2) 0.47748(14) 0.0209(5) Uani 1 1 d . . .
H15 H 0.0109 0.2129 0.5207 0.025 Uiso 1 1 d R . .
C16 C -0.09141(15) 0.13164(19) 0.44693(15) 0.0208(5) Uani 1 1 d . . .
C17 C -0.12335(14) 0.0578(2) 0.38231(13) 0.0211(5) Uani 1 1 d . . .
C18 C -0.07318(15) 0.0153(2) 0.34948(14) 0.0219(5) Uani 1 1 d . . .
H18 H -0.0949 -0.0344 0.3056 0.026 Uiso 1 1 d R . .
C19 C 0.01044(15) 0.0444(2) 0.38120(13) 0.0203(5) Uani 1 1 d . . .
N20 N 0.06648(12) 0.00642(17) 0.35275(11) 0.0211(4) Uani 1 1 d . . .
C21 C 0.05200(16) -0.0759(2) 0.30324(14) 0.0262(6) Uani 1 1 d . . .
H21 H 0.0020 -0.1178 0.2863 0.031 Uiso 1 1 d R . .
C22 C 0.11296(16) -0.1000(2) 0.27476(15) 0.0260(6) Uani 1 1 d . . .
N23 N 0.17984(12) -0.03507(17) 0.29634(11) 0.0208(4) Uani 1 1 d . . .
C24 C 0.22446(15) -0.0728(2) 0.25684(14) 0.0228(5) Uani 1 1 d . . .
C25 C 0.18277(17) -0.1682(2) 0.20957(16) 0.0306(6) Uani 1 1 d . . .
H25 H 0.2001 -0.2119 0.1762 0.037 Uiso 1 1 d R . .
C26 C 0.11395(18) -0.1850(2) 0.22121(17) 0.0359(7) Uani 1 1 d . . .

```

H26 H 0.0735 -0.2420 0.1984 0.043 Uiso 1 1 d R . . .  
C27 C 0.29877(15) -0.0271(2) 0.26541(14) 0.0226(5) Uani 1 1 d . . . .  
C28 C 0.50104(15) 0.2565(2) 0.54319(13) 0.0210(5) Uani 1 1 d . . . .  
C29 C 0.51180(18) 0.3698(2) 0.56150(16) 0.0274(6) Uani 1 1 d . . . .  
H29 H 0.4649 0.4162 0.5513 0.033 Uiso 1 1 d R . . .  
C30 C 0.58998(19) 0.4146(3) 0.59491(17) 0.0374(7) Uani 1 1 d . . . .  
H30 H 0.5972 0.4927 0.6070 0.045 Uiso 1 1 d R . . .  
C31 C 0.65804(17) 0.3475(3) 0.61048(16) 0.0349(7) Uani 1 1 d . . . .  
H31 H 0.7119 0.3795 0.6323 0.042 Uiso 1 1 d R . . .  
C32 C 0.64791(17) 0.2352(3) 0.59461(15) 0.0317(6) Uani 1 1 d . . . .  
H32 H 0.6949 0.1882 0.6065 0.038 Uiso 1 1 d R . . .  
C33 C 0.56998(15) 0.1893(2) 0.56160(13) 0.0248(5) Uani 1 1 d . . . .  
H33 H 0.5631 0.1108 0.5508 0.030 Uiso 1 1 d R . . .  
O34 O -0.14718(10) 0.16988(15) 0.47352(10) 0.0249(4) Uani 1 1 d . . . .  
C35 C -0.12470(17) 0.2641(2) 0.52592(17) 0.0320(6) Uani 1 1 d . . . .  
H35A H -0.1692 0.2812 0.5401 0.048 Uiso 1 1 d R . . .  
H35B H -0.0769 0.2460 0.5720 0.048 Uiso 1 1 d R . . .  
H35C H -0.1134 0.3276 0.5008 0.048 Uiso 1 1 d R . . .  
O36 O -0.20448(10) 0.03748(15) 0.35656(10) 0.0275(4) Uani 1 1 d . . . .  
C37 C -0.24229(16) -0.0282(2) 0.28650(15) 0.0323(6) Uani 1 1 d . . . .  
H37A H -0.2995 -0.0366 0.2742 0.049 Uiso 1 1 d R . . .  
H37B H -0.2357 0.0086 0.2441 0.049 Uiso 1 1 d R . . .  
H37C H -0.2170 -0.1004 0.2946 0.049 Uiso 1 1 d R . . .  
C38 C 0.33337(16) -0.0644(2) 0.20888(14) 0.0242(5) Uani 1 1 d . . . .  
C39 C 0.40864(19) -0.1172(2) 0.23368(17) 0.0338(7) Uani 1 1 d . . . .  
H39 H 0.4389 -0.1333 0.2881 0.041 Uiso 1 1 d R . . .  
C40 C 0.4412(2) -0.1444(3) 0.17992(18) 0.0381(7) Uani 1 1 d . . . .  
H40 H 0.4930 -0.1819 0.1972 0.046 Uiso 1 1 d R . . .  
C41 C 0.3979(2) -0.1199(2) 0.10176(17) 0.0342(7) Uani 1 1 d . . . .  
H41 H 0.4209 -0.1374 0.0651 0.041 Uiso 1 1 d R . . .  
C42 C 0.32251(18) -0.0686(2) 0.07621(16) 0.0322(6) Uani 1 1 d . . . .  
H42 H 0.2927 -0.0522 0.0217 0.039 Uiso 1 1 d R . . .  
C43 C 0.28962(17) -0.0419(2) 0.12971(15) 0.0291(6) Uani 1 1 d . . . .  
H43 H 0.2366 -0.0078 0.1120 0.035 Uiso 1 1 d R . . .  
N1A N 0.19374(16) 0.3832(2) 0.37472(13) 0.0356(7) Uani 1 1 d . . . .  
O1A O 0.13774(14) 0.31871(17) 0.37354(14) 0.0474(6) Uani 1 1 d . . . .  
O2A O 0.25633(16) 0.3390(2) 0.37534(14) 0.0524(6) Uani 1 1 d . . . .  
O3A O 0.18440(16) 0.4852(2) 0.37344(14) 0.0607(7) Uani 1 1 d . . . .  
N1B N 0.10757(14) 0.20536(18) 0.21382(12) 0.0262(5) Uani 1 1 d . . . .  
O1B O 0.06824(12) 0.16857(18) 0.25090(11) 0.0354(5) Uani 1 1 d . . . .  
O2B O 0.18453(11) 0.19611(16) 0.24561(11) 0.0325(4) Uani 1 1 d . . . .  
O3B O 0.07229(13) 0.2514(2) 0.15087(12) 0.0470(6) Uani 1 1 d . . . .  
O1C O 0.23988(12) -0.03738(15) 0.47102(10) 0.0252(4) Uani 1 1 d . . . .  
C2C C 0.31692(16) -0.0556(2) 0.53647(15) 0.0300(6) Uani 1 1 d . . . .  
H2CC H 0.3584 -0.0104 0.5309 0.045 Uiso 1 1 d R . . .  
H2CA H 0.3318 -0.1329 0.5390 0.045 Uiso 1 1 d R . . .  
H2CB H 0.3121 -0.0366 0.5841 0.045 Uiso 1 1 d R . . .  
H1C H 0.205(2) -0.057(3) 0.4818(19) 0.045(11) Uiso 1 1 d . . . .  
  
loop\_  
  \_atom\_site\_aniso\_label  
  \_atom\_site\_aniso\_U\_11  
  \_atom\_site\_aniso\_U\_22  
  \_atom\_site\_aniso\_U\_33  
  \_atom\_site\_aniso\_U\_23  
  \_atom\_site\_aniso\_U\_13  
  \_atom\_site\_aniso\_U\_12  
Gd1 0.01700(8) 0.02149(8) 0.01543(8) -0.00011(4) 0.00758(5) -0.00174(4)  
N1 0.0190(10) 0.0244(11) 0.0171(10) -0.0001(8) 0.0081(8) 0.0002(9)  
C2 0.0225(12) 0.0259(13) 0.0174(12) 0.0011(10) 0.0095(10) 0.0009(10)

C3 0.0252(13) 0.0331(14) 0.0223(13) -0.0020(11) 0.0144(11) -0.0039(11)  
C4 0.0209(13) 0.0332(14) 0.0232(13) 0.0007(11) 0.0097(11) -0.0048(11)  
C5 0.0195(12) 0.0215(12) 0.0193(12) 0.0020(10) 0.0072(10) -0.0024(10)  
C6 0.0212(12) 0.0199(12) 0.0211(12) 0.0031(10) 0.0089(10) -0.0002(10)  
C7 0.0200(12) 0.0196(12) 0.0201(12) 0.0002(10) 0.0079(10) -0.0010(10)  
N8 0.0195(10) 0.0229(11) 0.0195(10) -0.0002(8) 0.0090(8) -0.0014(8)  
C9 0.0213(12) 0.0209(12) 0.0186(12) -0.0018(10) 0.0086(10) -0.0006(10)  
C10 0.0246(14) 0.0294(15) 0.0216(14) -0.0038(10) 0.0109(11) -0.0003(10)  
C11 0.0201(13) 0.0301(14) 0.0205(12) -0.0037(10) 0.0068(10) -0.0022(10)  
C12 0.0217(13) 0.0257(13) 0.0216(12) -0.0008(10) 0.0116(10) 0.0019(10)  
N13 0.0191(11) 0.0224(11) 0.0203(11) 0.0000(8) 0.0083(9) -0.0013(8)  
C14 0.0170(12) 0.0218(12) 0.0188(12) 0.0053(9) 0.0086(10) 0.0004(9)  
C15 0.0216(13) 0.0232(12) 0.0186(12) 0.0022(10) 0.0088(10) -0.0006(10)  
C16 0.0211(13) 0.0225(13) 0.0228(13) 0.0071(9) 0.0130(10) 0.0029(10)  
C17 0.0171(12) 0.0241(12) 0.0212(12) 0.0049(10) 0.0071(10) -0.0017(10)  
C18 0.0223(12) 0.0226(12) 0.0196(12) 0.0021(10) 0.0074(10) -0.0009(10)  
C19 0.0217(12) 0.0234(12) 0.0179(12) 0.0055(10) 0.0105(10) 0.0017(10)  
N20 0.0211(11) 0.0233(11) 0.0198(10) 0.0002(8) 0.0094(9) -0.0021(9)  
C21 0.0254(13) 0.0294(14) 0.0273(13) -0.0053(11) 0.0144(11) -0.0087(11)  
C22 0.0273(14) 0.0283(13) 0.0257(14) -0.0061(11) 0.0142(11) -0.0079(11)  
N23 0.0214(11) 0.0237(11) 0.0186(10) -0.0009(8) 0.0094(8) -0.0010(9)  
C24 0.0248(13) 0.0266(13) 0.0185(12) -0.0004(10) 0.0104(10) -0.0006(11)  
C25 0.0342(15) 0.0320(14) 0.0309(15) -0.0128(12) 0.0188(12) -0.0073(13)  
C26 0.0378(17) 0.0352(16) 0.0405(16) -0.0162(13) 0.0219(14) -0.0143(13)  
C27 0.0249(13) 0.0252(13) 0.0191(12) 0.0016(10) 0.0106(10) 0.0023(11)  
C28 0.0206(13) 0.0277(13) 0.0147(12) -0.0002(9) 0.0073(10) -0.0018(10)  
C29 0.0280(14) 0.0301(15) 0.0256(14) -0.0030(10) 0.0125(12) -0.0017(11)  
C30 0.0414(18) 0.0384(16) 0.0326(16) -0.0098(13) 0.0153(13) -0.0176(14)  
C31 0.0247(14) 0.0567(19) 0.0225(14) -0.0070(13) 0.0089(11) -0.0169(14)  
C32 0.0211(13) 0.0511(18) 0.0223(13) 0.0017(12) 0.0083(11) -0.0015(13)  
C33 0.0240(13) 0.0329(15) 0.0175(12) 0.0020(10) 0.0084(10) 0.0010(11)  
O34 0.0207(9) 0.0279(9) 0.0303(10) -0.0012(8) 0.0148(8) -0.0012(8)  
C35 0.0306(15) 0.0297(14) 0.0407(16) -0.0053(12) 0.0197(13) 0.0012(12)  
O36 0.0169(9) 0.0366(11) 0.0290(9) -0.0022(8) 0.0092(7) -0.0034(8)  
C37 0.0218(13) 0.0458(17) 0.0249(14) -0.0021(12) 0.0049(11) -0.0049(12)  
C38 0.0289(14) 0.0252(13) 0.0234(13) -0.0045(10) 0.0157(11) -0.0049(11)  
C39 0.0365(16) 0.0434(17) 0.0251(15) 0.0002(12) 0.0164(13) 0.0088(13)  
C40 0.0392(17) 0.0464(18) 0.0341(17) -0.0006(13) 0.0205(14) 0.0151(14)  
C41 0.0476(19) 0.0357(16) 0.0298(15) -0.0052(12) 0.0265(14) -0.0004(13)  
C42 0.0425(17) 0.0356(16) 0.0213(13) -0.0028(12) 0.0160(12) -0.0008(13)  
C43 0.0306(14) 0.0334(15) 0.0251(14) -0.0019(11) 0.0130(12) 0.0000(12)  
N1A 0.0488(19) 0.0268(14) 0.0271(15) 0.0017(9) 0.0114(13) 0.0002(11)  
O1A 0.0464(13) 0.0240(11) 0.0679(15) 0.0080(10) 0.0194(12) -0.0016(10)  
O2A 0.0590(16) 0.0570(14) 0.0482(14) 0.0192(12) 0.0293(12) 0.0128(13)  
O3A 0.087(2) 0.0250(12) 0.0784(19) 0.0003(11) 0.0421(16) -0.0069(11)  
N1B 0.0296(12) 0.0288(12) 0.0206(11) 0.0019(9) 0.0105(10) -0.0002(10)  
O1B 0.0314(11) 0.0503(12) 0.0287(10) 0.0137(9) 0.0167(9) 0.0062(10)  
O2B 0.0212(10) 0.0400(11) 0.0349(10) 0.0113(9) 0.0099(8) -0.0002(8)  
O3B 0.0360(12) 0.0724(16) 0.0298(11) 0.0283(11) 0.0107(10) 0.0105(11)  
O1C 0.0222(9) 0.0289(10) 0.0266(10) 0.0050(8) 0.0124(8) -0.0002(8)  
C2C 0.0266(14) 0.0337(15) 0.0297(14) 0.0062(12) 0.0115(11) 0.0047(12)

\_geom\_special\_details

;

All esds (except the esd in the dihedral angle between two l.s. planes)  
are estimated using the full covariance matrix. The cell esds are  
taken  
into account individually in the estimation of esds in distances,  
angles

and torsion angles; correlations between esds in cell parameters are only

used when they are defined by crystal symmetry. An approximate (isotropic)

treatment of cell esds is used for estimating esds involving l.s. planes.

;

loop\_

|                              |            |     |          |      |          |     |
|------------------------------|------------|-----|----------|------|----------|-----|
| _geom_bond_atom_site_label_1 | C21        | H21 | 0.9602   | . ?  |          |     |
| _geom_bond_atom_site_label_2 | C22        | N23 | 1.344(3) | . ?  |          |     |
| _geom_bond_distance          | C22        | C26 | 1.437(4) | . ?  |          |     |
| _geom_bond_site_symmetry_2   | N23        | C24 | 1.372(3) | . ?  |          |     |
| _geom_bond_publ_flag         | C24        | C27 | 1.387(4) | . ?  |          |     |
| Gd1 N8                       | 2.4142(19) | . ? | C24      | C25  | 1.453(4) | . ? |
| Gd1 N23                      | 2.424(2)   | . ? | C25      | C26  | 1.353(4) | . ? |
| Gd1 O1A                      | 2.484(2)   | . ? | C25      | H25  | 0.9600   | . ? |
| Gd1 N1                       | 2.486(2)   | . ? | C26      | H26  | 0.9601   | . ? |
| Gd1 N13                      | 2.540(2)   | . ? | C27      | C38  | 1.501(3) | . ? |
| Gd1 O1C                      | 2.5498(18) | . ? | C28      | C33  | 1.394(4) | . ? |
| Gd1 O1B                      | 2.5500(19) | . ? | C28      | C29  | 1.396(3) | . ? |
| Gd1 O2B                      | 2.5529(18) | . ? | C29      | C30  | 1.387(4) | . ? |
| Gd1 N20                      | 2.565(2)   | . ? | C29      | H29  | 0.9600   | . ? |
| Gd1 O2A                      | 2.786(3)   | . ? | C30      | C31  | 1.388(4) | . ? |
| Gd1 N1B                      | 2.963(2)   | . ? | C30      | H30  | 0.9600   | . ? |
| N1 C2                        | 1.377(3)   | . ? | C31      | C32  | 1.374(4) | . ? |
| N1 C5                        | 1.380(3)   | . ? | C31      | H31  | 0.9599   | . ? |
| C2 C27                       | 1.432(3)   | . ? | C32      | C33  | 1.388(4) | . ? |
| C2 C3                        | 1.437(3)   | . ? | C32      | H32  | 0.9600   | . ? |
| C3 C4                        | 1.354(4)   | . ? | C33      | H33  | 0.9599   | . ? |
| C3 H3                        | 0.9600     | . ? | O34      | C35  | 1.443(3) | . ? |
| C4 C5                        | 1.431(4)   | . ? | C35      | H35A | 0.9600   | . ? |
| C4 H4                        | 0.9598     | . ? | C35      | H35B | 0.9599   | . ? |
| C5 C6                        | 1.438(3)   | . ? | C35      | H35C | 0.9601   | . ? |
| C6 C7                        | 1.394(3)   | . ? | O36      | C37  | 1.442(3) | . ? |
| C6 C28                       | 1.492(3)   | . ? | C37      | H37A | 0.9601   | . ? |
| C7 N8                        | 1.368(3)   | . ? | C37      | H37B | 0.9599   | . ? |
| C7 C11                       | 1.461(3)   | . ? | C37      | H37C | 0.9600   | . ? |
| N8 C9                        | 1.343(3)   | . ? | C38      | C39  | 1.387(4) | . ? |
| C9 C12                       | 1.434(3)   | . ? | C38      | C43  | 1.393(4) | . ? |
| C9 C10                       | 1.436(3)   | . ? | C39      | C40  | 1.397(4) | . ? |
| C10 C11                      | 1.351(3)   | . ? | C39      | H39  | 0.9599   | . ? |
| C10 H10                      | 0.9600     | . ? | C40      | C41  | 1.381(4) | . ? |
| C11 H11                      | 0.9600     | . ? | C40      | H40  | 0.9598   | . ? |
| C12 N13                      | 1.301(3)   | . ? | C41      | C42  | 1.379(4) | . ? |
| C12 H12                      | 0.9600     | . ? | C41      | H41  | 0.9600   | . ? |
| N13 C14                      | 1.387(3)   | . ? | C42      | C43  | 1.395(4) | . ? |
| C14 C15                      | 1.404(3)   | . ? | C42      | H42  | 0.9601   | . ? |
| C14 C19                      | 1.417(3)   | . ? | C43      | H43  | 0.9601   | . ? |
| C15 C16                      | 1.377(3)   | . ? | N1A      | O3A  | 1.233(3) | . ? |
| C15 H15                      | 0.9600     | . ? | N1A      | O2A  | 1.236(3) | . ? |
| C16 O34                      | 1.367(3)   | . ? | N1A      | O1A  | 1.260(3) | . ? |
| C16 C17                      | 1.419(4)   | . ? | N1B      | O3B  | 1.220(3) | . ? |
| C17 O36                      | 1.353(3)   | . ? | N1B      | O1B  | 1.257(3) | . ? |
| C17 C18                      | 1.380(3)   | . ? | N1B      | O2B  | 1.263(3) | . ? |
| C18 C19                      | 1.411(3)   | . ? | O1C      | C2C  | 1.439(3) | . ? |
| C18 H18                      | 0.9600     | . ? | O1C      | H1C  | 0.76(3)  | . ? |
| C19 N20                      | 1.394(3)   | . ? | C2C      | H2CC | 0.9599   | . ? |
| N20 C21                      | 1.307(3)   | . ? | C2C      | H2CA | 0.9600   | . ? |
| C21 C22                      | 1.430(4)   | . ? | C2C      | H2CB | 0.9601   | . ? |

|                               |  |  |  |  |                              |
|-------------------------------|--|--|--|--|------------------------------|
| loop_                         |  |  |  |  | O1B Gd1 N1B 24.95(6) . . ?   |
| _geom_angle_atom_site_label_1 |  |  |  |  | O2B Gd1 N1B 25.09(6) . . ?   |
| _geom_angle_atom_site_label_2 |  |  |  |  | N20 Gd1 N1B 87.21(6) . . ?   |
| _geom_angle_atom_site_label_3 |  |  |  |  | O2A Gd1 N1B 74.89(6) . . ?   |
| _geom_angle                   |  |  |  |  | C2 N1 C5 106.0(2) . . ?      |
| _geom_angle_site_symmetry_1   |  |  |  |  | C2 N1 Gd1 122.64(15) . . ?   |
| _geom_angle_site_symmetry_3   |  |  |  |  | C5 N1 Gd1 123.56(16) . . ?   |
| _geom_angle_publ_flag         |  |  |  |  | N1 C2 C27 127.6(2) . . ?     |
| N8 Gd1 N23 138.00(7) . . ?    |  |  |  |  | N1 C2 C3 109.7(2) . . ?      |
| N8 Gd1 O1A 79.48(7) . . ?     |  |  |  |  | C27 C2 C3 122.6(2) . . ?     |
| N23 Gd1 O1A 142.16(7) . . ?   |  |  |  |  | C4 C3 C2 107.1(2) . . ?      |
| N8 Gd1 N1 75.68(6) . . ?      |  |  |  |  | C4 C3 H3 126.6 . . ?         |
| N23 Gd1 N1 74.46(7) . . ?     |  |  |  |  | C2 C3 H3 126.3 . . ?         |
| O1A Gd1 N1 122.79(7) . . ?    |  |  |  |  | C3 C4 C5 107.2(2) . . ?      |
| N8 Gd1 N13 66.02(7) . . ?     |  |  |  |  | C3 C4 H4 126.7 . . ?         |
| N23 Gd1 N13 123.63(7) . . ?   |  |  |  |  | C5 C4 H4 126.1 . . ?         |
| O1A Gd1 N13 69.26(7) . . ?    |  |  |  |  | N1 C5 C4 109.9(2) . . ?      |
| N1 Gd1 N13 137.06(6) . . ?    |  |  |  |  | N1 C5 C6 127.7(2) . . ?      |
| N8 Gd1 O1C 70.85(6) . . ?     |  |  |  |  | C4 C5 C6 122.4(2) . . ?      |
| N23 Gd1 O1C 74.26(6) . . ?    |  |  |  |  | C7 C6 C5 126.7(2) . . ?      |
| O1A Gd1 O1C 138.61(7) . . ?   |  |  |  |  | C7 C6 C28 117.6(2) . . ?     |
| N1 Gd1 O1C 77.29(6) . . ?     |  |  |  |  | C5 C6 C28 115.6(2) . . ?     |
| N13 Gd1 O1C 72.54(6) . . ?    |  |  |  |  | N8 C7 C6 124.1(2) . . ?      |
| N8 Gd1 O1B 146.48(7) . . ?    |  |  |  |  | N8 C7 C11 108.6(2) . . ?     |
| N23 Gd1 O1B 75.51(7) . . ?    |  |  |  |  | C6 C7 C11 127.3(2) . . ?     |
| O1A Gd1 O1B 67.09(7) . . ?    |  |  |  |  | C9 N8 C7 107.23(19) . . ?    |
| N1 Gd1 O1B 124.52(6) . . ?    |  |  |  |  | C9 N8 Gd1 119.16(15) . . ?   |
| N13 Gd1 O1B 98.38(6) . . ?    |  |  |  |  | C7 N8 Gd1 133.57(15) . . ?   |
| O1C Gd1 O1B 135.06(6) . . ?   |  |  |  |  | N8 C9 C12 119.5(2) . . ?     |
| N8 Gd1 O2B 127.45(6) . . ?    |  |  |  |  | N8 C9 C10 110.8(2) . . ?     |
| N23 Gd1 O2B 72.44(6) . . ?    |  |  |  |  | C12 C9 C10 129.7(2) . . ?    |
| O1A Gd1 O2B 79.12(7) . . ?    |  |  |  |  | C11 C10 C9 106.5(2) . . ?    |
| N1 Gd1 O2B 76.86(6) . . ?     |  |  |  |  | C11 C10 H10 126.9 . . ?      |
| N13 Gd1 O2B 142.83(6) . . ?   |  |  |  |  | C9 C10 H10 126.6 . . ?       |
| O1C Gd1 O2B 142.13(6) . . ?   |  |  |  |  | C10 C11 C7 106.9(2) . . ?    |
| O1B Gd1 O2B 49.90(6) . . ?    |  |  |  |  | C10 C11 H11 126.6 . . ?      |
| N8 Gd1 N20 122.94(6) . . ?    |  |  |  |  | C7 C11 H11 126.5 . . ?       |
| N23 Gd1 N20 65.33(6) . . ?    |  |  |  |  | N13 C12 C9 117.7(2) . . ?    |
| O1A Gd1 N20 101.96(7) . . ?   |  |  |  |  | N13 C12 H12 120.9 . . ?      |
| N1 Gd1 N20 134.76(7) . . ?    |  |  |  |  | C9 C12 H12 121.3 . . ?       |
| N13 Gd1 N20 61.96(6) . . ?    |  |  |  |  | C12 N13 C14 123.6(2) . . ?   |
| O1C Gd1 N20 72.74(6) . . ?    |  |  |  |  | C12 N13 Gd1 117.05(16) . . ? |
| O1B Gd1 N20 64.69(6) . . ?    |  |  |  |  | C14 N13 Gd1 118.77(15) . . ? |
| O2B Gd1 N20 108.23(6) . . ?   |  |  |  |  | N13 C14 C15 124.4(2) . . ?   |
| N8 Gd1 O2A 66.63(7) . . ?     |  |  |  |  | N13 C14 C19 116.0(2) . . ?   |
| N23 Gd1 O2A 131.09(7) . . ?   |  |  |  |  | C15 C14 C19 119.6(2) . . ?   |
| O1A Gd1 O2A 47.15(8) . . ?    |  |  |  |  | C16 C15 C14 120.0(2) . . ?   |
| N1 Gd1 O2A 75.68(7) . . ?     |  |  |  |  | C16 C15 H15 120.2 . . ?      |
| N13 Gd1 O2A 104.60(7) . . ?   |  |  |  |  | C14 C15 H15 119.8 . . ?      |
| O1C Gd1 O2A 133.85(6) . . ?   |  |  |  |  | O34 C16 C15 124.5(2) . . ?   |
| O1B Gd1 O2A 91.07(7) . . ?    |  |  |  |  | O34 C16 C17 115.0(2) . . ?   |
| O2B Gd1 O2A 63.59(7) . . ?    |  |  |  |  | C15 C16 C17 120.5(2) . . ?   |
| N20 Gd1 O2A 148.02(7) . . ?   |  |  |  |  | O36 C17 C18 125.1(2) . . ?   |
| N8 Gd1 N1B 140.98(6) . . ?    |  |  |  |  | O36 C17 C16 114.5(2) . . ?   |
| N23 Gd1 N1B 74.18(6) . . ?    |  |  |  |  | C18 C17 C16 120.3(2) . . ?   |
| O1A Gd1 N1B 69.56(7) . . ?    |  |  |  |  | C17 C18 C19 119.6(2) . . ?   |
| N1 Gd1 N1B 101.40(6) . . ?    |  |  |  |  | C17 C18 H18 120.2 . . ?      |
| N13 Gd1 N1B 120.43(6) . . ?   |  |  |  |  | C19 C18 H18 120.1 . . ?      |
| O1C Gd1 N1B 147.51(6) . . ?   |  |  |  |  | N20 C19 C18 124.4(2) . . ?   |
|                               |  |  |  |  | N20 C19 C14 115.6(2) . . ?   |

|                              |                                     |
|------------------------------|-------------------------------------|
| C18 C19 C14 119.9(2) . . ?   | C38 C39 C40 120.1(3) . . ?          |
| C21 N20 C19 123.8(2) . . ?   | C38 C39 H39 119.7 . . ?             |
| C21 N20 Gd1 117.26(16) . . ? | C40 C39 H39 120.1 . . ?             |
| C19 N20 Gd1 117.86(15) . . ? | C41 C40 C39 120.0(3) . . ?          |
| N20 C21 C22 117.4(2) . . ?   | C41 C40 H40 120.1 . . ?             |
| N20 C21 H21 121.0 . . ?      | C39 C40 H40 119.9 . . ?             |
| C22 C21 H21 121.6 . . ?      | C42 C41 C40 120.5(3) . . ?          |
| N23 C22 C21 119.6(2) . . ?   | C42 C41 H41 119.8 . . ?             |
| N23 C22 C26 110.8(2) . . ?   | C40 C41 H41 119.8 . . ?             |
| C21 C22 C26 129.5(2) . . ?   | C41 C42 C43 119.7(3) . . ?          |
| C22 N23 C24 107.0(2) . . ?   | C41 C42 H42 119.9 . . ?             |
| C22 N23 Gd1 119.85(16) . . ? | C43 C42 H42 120.4 . . ?             |
| C24 N23 Gd1 132.70(16) . . ? | C38 C43 C42 120.4(3) . . ?          |
| N23 C24 C27 123.5(2) . . ?   | C38 C43 H43 119.7 . . ?             |
| N23 C24 C25 108.8(2) . . ?   | C42 C43 H43 119.9 . . ?             |
| C27 C24 C25 127.6(2) . . ?   | O3A N1A O2A 122.7(3) . . ?          |
| C26 C25 C24 107.0(2) . . ?   | O3A N1A O1A 120.5(3) . . ?          |
| C26 C25 H25 125.8 . . ?      | O2A N1A O1A 116.8(3) . . ?          |
| C24 C25 H25 127.2 . . ?      | N1A O1A Gd1 105.19(18) . . ?        |
| C25 C26 C22 106.4(2) . . ?   | N1A O2A Gd1 90.85(18) . . ?         |
| C25 C26 H26 127.2 . . ?      | O3B N1B O1B 120.7(2) . . ?          |
| C22 C26 H26 126.4 . . ?      | O3B N1B O2B 121.9(2) . . ?          |
| C24 C27 C2 126.7(2) . . ?    | O1B N1B O2B 117.3(2) . . ?          |
| C24 C27 C38 117.1(2) . . ?   | O3B N1B Gd1 171.19(19) . . ?        |
| C2 C27 C38 116.2(2) . . ?    | O1B N1B Gd1 58.83(12) . . ?         |
| C33 C28 C29 118.8(2) . . ?   | O2B N1B Gd1 58.99(12) . . ?         |
| C33 C28 C6 120.9(2) . . ?    | N1B O1B Gd1 96.22(14) . . ?         |
| C29 C28 C6 120.3(2) . . ?    | N1B O2B Gd1 95.92(14) . . ?         |
| C30 C29 C28 120.0(3) . . ?   | C2C O1C Gd1 129.60(16) . . ?        |
| C30 C29 H29 120.4 . . ?      | C2C O1C H1C 109(3) . . ?            |
| C28 C29 H29 119.6 . . ?      | Gd1 O1C H1C 111(3) . . ?            |
| C29 C30 C31 120.5(3) . . ?   | O1C C2C H2CC 109.6 . . ?            |
| C29 C30 H30 119.8 . . ?      | O1C C2C H2CA 109.8 . . ?            |
| C31 C30 H30 119.6 . . ?      | H2CC C2C H2CA 109.7 . . ?           |
| C32 C31 C30 119.7(3) . . ?   | O1C C2C H2CB 109.8 . . ?            |
| C32 C31 H31 120.3 . . ?      | H2CC C2C H2CB 109.7 . . ?           |
| C30 C31 H31 120.0 . . ?      | H2CA C2C H2CB 108.2 . . ?           |
| C31 C32 C33 120.3(3) . . ?   |                                     |
| C31 C32 H32 119.9 . . ?      | loop_                               |
| C33 C32 H32 119.8 . . ?      | _geom_torsion_atom_site_label_1     |
| C32 C33 C28 120.6(3) . . ?   | _geom_torsion_atom_site_label_2     |
| C32 C33 H33 120.1 . . ?      | _geom_torsion_atom_site_label_3     |
| C28 C33 H33 119.3 . . ?      | _geom_torsion_atom_site_label_4     |
| C16 O34 C35 118.1(2) . . ?   | _geom_torsion                       |
| O34 C35 H35A 109.0 . . ?     | _geom_torsion_site_symmetry_1       |
| O34 C35 H35B 109.5 . . ?     | _geom_torsion_site_symmetry_2       |
| H35A C35 H35B 109.5 . . ?    | _geom_torsion_site_symmetry_3       |
| O34 C35 H35C 109.9 . . ?     | _geom_torsion_site_symmetry_4       |
| H35A C35 H35C 109.5 . . ?    | _geom_torsion_publ_flag             |
| H35B C35 H35C 109.5 . . ?    | N8 Gd1 N1 C2 -174.4(2) . . . . ?    |
| C17 O36 C37 117.3(2) . . ?   | N23 Gd1 N1 C2 35.51(18) . . . . ?   |
| O36 C37 H37A 109.4 . . ?     | O1A Gd1 N1 C2 -107.24(19) . . . . ? |
| O36 C37 H37B 109.6 . . ?     | N13 Gd1 N1 C2 158.52(16) . . . . ?  |
| H37A C37 H37B 109.5 . . ?    | O1C Gd1 N1 C2 112.45(19) . . . . ?  |
| O36 C37 H37C 109.5 . . ?     | O1B Gd1 N1 C2 -24.1(2) . . . . ?    |
| H37A C37 H37C 109.5 . . ?    | O2B Gd1 N1 C2 -39.62(18) . . . . ?  |
| H37B C37 H37C 109.5 . . ?    | N20 Gd1 N1 C2 63.1(2) . . . . ?     |
| C39 C38 C43 119.4(2) . . ?   | O2A Gd1 N1 C2 -105.31(19) . . . . ? |
| C39 C38 C27 121.7(2) . . ?   | N1B Gd1 N1 C2 -34.33(19) . . . . ?  |
| C43 C38 C27 118.9(2) . . ?   | N8 Gd1 N1 C5 -29.61(18) . . . . ?   |

|                                     |                                       |
|-------------------------------------|---------------------------------------|
| N23 Gd1 N1 C5 -179.73(19) . . . . ? | C12 C9 C10 C11 178.3(3) . . . . ?     |
| O1A Gd1 N1 C5 37.5(2) . . . . ?     | C9 C10 C11 C7 -0.1(3) . . . . ?       |
| N13 Gd1 N1 C5 -56.7(2) . . . . ?    | N8 C7 C11 C10 0.0(3) . . . . ?        |
| O1C Gd1 N1 C5 -102.79(18) . . . . ? | C6 C7 C11 C10 -178.2(2) . . . . ?     |
| O1B Gd1 N1 C5 120.70(18) . . . . ?  | N8 C9 C12 N13 3.0(3) . . . . ?        |
| O2B Gd1 N1 C5 105.14(19) . . . . ?  | C10 C9 C12 N13 -175.0(2) . . . . ?    |
| N20 Gd1 N1 C5 -152.10(16) . . . . ? | C9 C12 N13 C14 -178.9(2) . . . . ?    |
| O2A Gd1 N1 C5 39.45(18) . . . . ?   | C9 C12 N13 Gd1 -7.5(3) . . . . ?      |
| N1B Gd1 N1 C5 110.43(18) . . . . ?  | N8 Gd1 N13 C12 6.60(17) . . . . ?     |
| C5 N1 C2 C27 173.5(2) . . . . ?     | N23 Gd1 N13 C12 139.51(17) . . . .    |
| Gd1 N1 C2 C27 -36.5(3) . . . . ?    | O1A Gd1 N13 C12 -80.82(18) . . . .    |
| C5 N1 C2 C3 -2.9(3) . . . . ?       | N1 Gd1 N13 C12 35.5(2) . . . . ?      |
| Gd1 N1 C2 C3 147.08(17) . . . . ?   | O1C Gd1 N13 C12 82.92(18) . . . .     |
| N1 C2 C3 C4 2.7(3) . . . . ?        | O1B Gd1 N13 C12 -142.36(17) . . . .   |
| C27 C2 C3 C4 -173.9(2) . . . . ?    | O2B Gd1 N13 C12 -114.38(18) . . . .   |
| C2 C3 C4 C5 -1.3(3) . . . . ?       | N20 Gd1 N13 C12 162.26(19) . . . .    |
| C2 N1 C5 C4 2.1(3) . . . . ?        | O2A Gd1 N13 C12 -49.04(18) . . . .    |
| Gd1 N1 C5 C4 -147.56(17) . . . . ?  | N1B Gd1 N13 C12 -129.87(17) . . . .   |
| C2 N1 C5 C6 -175.9(2) . . . . ?     | N8 Gd1 N13 C14 178.41(18) . . . .     |
| Gd1 N1 C5 C6 34.4(3) . . . . ?      | N23 Gd1 N13 C14 -48.68(18) . . . .    |
| C3 C4 C5 N1 -0.4(3) . . . . ?       | O1A Gd1 N13 C14 91.00(17) . . . . ?   |
| C3 C4 C5 C6 177.7(2) . . . . ?      | N1 Gd1 N13 C14 -152.70(15) . . . . ?  |
| N1 C5 C6 C7 -10.2(4) . . . . ?      | O1C Gd1 N13 C14 -105.27(17) . . . . ? |
| C4 C5 C6 C7 172.0(2) . . . . ?      | O1B Gd1 N13 C14 29.46(17) . . . . ?   |
| N1 C5 C6 C28 170.0(2) . . . . ?     | O2B Gd1 N13 C14 57.4(2) . . . . ?     |
| C4 C5 C6 C28 -7.8(3) . . . . ?      | N20 Gd1 N13 C14 -25.92(15) . . . .    |
| C5 C6 C7 N8 -7.6(4) . . . . ?       | O2A Gd1 N13 C14 122.77(16) . . . .    |
| C28 C6 C7 N8 172.2(2) . . . . ?     | N1B Gd1 N13 C14 41.95(18) . . . .     |
| C5 C6 C7 C11 170.4(2) . . . . ?     | C12 N13 C14 C15 16.3(4) . . . . ?     |
| C28 C6 C7 C11 -9.8(4) . . . . ?     | Gd1 N13 C14 C15 -154.92(19) . . . .   |
| C6 C7 N8 C9 178.3(2) . . . . ?      | C12 N13 C14 C19 -164.0(2) . . . .     |
| C11 C7 N8 C9 0.0(3) . . . . ?       | Gd1 N13 C14 C19 24.7(3) . . . . ?     |
| C6 C7 N8 Gd1 -4.0(4) . . . . ?      | N13 C14 C15 C16 179.7(2) . . . . ?    |
| C11 C7 N8 Gd1 177.72(16) . . . . ?  | C19 C14 C15 C16 0.1(3) . . . . ?      |
| N23 Gd1 N8 C9 -119.28(18) . . . .   | C14 C15 C16 O34 -179.2(2) . . . .     |
| ?                                   | C14 C15 C16 C17 -0.7(4) . . . . ?     |
| O1A Gd1 N8 C9 66.88(18) . . . . ?   | O34 C16 C17 O36 0.6(3) . . . . ?      |
| N1 Gd1 N8 C9 -165.11(19) . . . . ?  | C15 C16 C17 O36 -178.1(2) . . . .     |
| N13 Gd1 N8 C9 -4.96(16) . . . . ?   | O34 C16 C17 C18 178.8(2) . . . . ?    |
| O1C Gd1 N8 C9 -83.83(18) . . . . ?  | C15 C16 C17 C18 0.2(4) . . . . ?      |
| O1B Gd1 N8 C9 62.5(2) . . . . ?     | O36 C17 C18 C19 179.0(2) . . . . ?    |
| O2B Gd1 N8 C9 134.30(17) . . . . ?  | C16 C17 C18 C19 0.9(4) . . . . ?      |
| N20 Gd1 N8 C9 -30.6(2) . . . . ?    | C17 C18 C19 N20 180.0(2) . . . . ?    |
| O2A Gd1 N8 C9 114.55(19) . . . . ?  | C17 C18 C19 C14 -1.5(3) . . . . ?     |
| N1B Gd1 N8 C9 104.39(18) . . . . ?  | N13 C14 C19 N20 0.0(3) . . . . ?      |
| N23 Gd1 N8 C7 63.3(2) . . . . ?     | C15 C14 C19 N20 179.7(2) . . . . ?    |
| O1A Gd1 N8 C7 -110.6(2) . . . . ?   | N13 C14 C19 C18 -178.6(2) . . . .     |
| N1 Gd1 N8 C7 17.4(2) . . . . ?      | C15 C14 C19 C18 1.0(3) . . . . ?      |
| N13 Gd1 N8 C7 177.6(2) . . . . ?    | C18 C19 N20 C21 -13.2(4) . . . . ?    |
| O1C Gd1 N8 C7 98.7(2) . . . . ?     | C14 C19 N20 C21 168.2(2) . . . . ?    |
| O1B Gd1 N8 C7 -114.9(2) . . . . ?   | C18 C19 N20 Gd1 154.33(19) . . . .    |
| O2B Gd1 N8 C7 -43.1(2) . . . . ?    | C14 C19 N20 Gd1 -24.3(2) . . . . ?    |
| N20 Gd1 N8 C7 151.9(2) . . . . ?    | N8 Gd1 N20 C21 -139.30(17) . . . .    |
| O2A Gd1 N8 C7 -62.9(2) . . . . ?    | N23 Gd1 N20 C21 -6.71(17) . . . .     |
| N1B Gd1 N8 C7 -73.1(2) . . . . ?    | O1A Gd1 N20 C21 135.58(18) . . . .    |
| C7 N8 C9 C12 -178.5(2) . . . . ?    | N1 Gd1 N20 C21 -36.2(2) . . . . ?     |
| Gd1 N8 C9 C12 3.4(3) . . . . ?      | N13 Gd1 N20 C21 -166.0(2) . . . .     |
| C7 N8 C9 C10 -0.1(3) . . . . ?      | O1C Gd1 N20 C21 -86.93(18) . . . .    |
| Gd1 N8 C9 C10 -178.16(16) . . . .   | O1B Gd1 N20 C21 78.28(18) . . . .     |
| N8 C9 C10 C11 0.1(3) . . . . ?      | O2B Gd1 N20 C21 53.24(19) . . . .     |

|                                        |                                         |
|----------------------------------------|-----------------------------------------|
| O2A Gd1 N20 C21 122.35(19) . . . . .   | C5 C6 C28 C29 121.8(3) . . . . . ?      |
| N1B Gd1 N20 C21 67.15(18) . . . . .    | C33 C28 C29 C30 2.2(4) . . . . . ?      |
| N8 Gd1 N20 C19 52.32(18) . . . . . ?   | C6 C28 C29 C30 -176.2(2) . . . . . ?    |
| N23 Gd1 N20 C19 -175.08(17) . . . . ?  | C28 C29 C30 C31 0.0(4) . . . . . ?      |
| O1A Gd1 N20 C19 -32.79(17) . . . . ?   | C29 C30 C31 C32 -1.8(4) . . . . . ?     |
| N1 Gd1 N20 C19 155.46(14) . . . . ?    | C30 C31 C32 C33 1.4(4) . . . . . ?      |
| N13 Gd1 N20 C19 25.67(15) . . . . . ?  | C31 C32 C33 C28 0.8(4) . . . . . ?      |
| O1C Gd1 N20 C19 104.70(16) . . . . ?   | C29 C28 C33 C32 -2.6(4) . . . . . ?     |
| O1B Gd1 N20 C19 -90.09(16) . . . . ?   | C6 C28 C33 C32 175.8(2) . . . . . ?     |
| O2B Gd1 N20 C19 -115.13(15) . . . . ?  | C15 C16 O34 C35 13.0(3) . . . . . ?     |
| O2A Gd1 N20 C19 -46.0(2) . . . . . ?   | C17 C16 O34 C35 -165.6(2) . . . . ?     |
| N1B Gd1 N20 C19 -101.22(16) . . . . ?  | C18 C17 O36 C37 -4.0(3) . . . . . ?     |
| C19 N20 C21 C22 175.4(2) . . . . . ?   | C16 C17 O36 C37 174.2(2) . . . . . ?    |
| Gd1 N20 C21 C22 7.7(3) . . . . . ?     | C24 C27 C38 C39 -119.6(3) . . . . ?     |
| N20 C21 C22 N23 -3.3(4) . . . . . ?    | C2 C27 C38 C39 59.7(3) . . . . . ?      |
| N20 C21 C22 C26 179.4(3) . . . . . ?   | C24 C27 C38 C43 62.5(3) . . . . . ?     |
| C21 C22 N23 C24 -176.2(2) . . . . . ?  | C2 C27 C38 C43 -118.2(3) . . . . . ?    |
| C26 C22 N23 C24 1.6(3) . . . . . ?     | C43 C38 C39 C40 2.0(4) . . . . . ?      |
| C21 C22 N23 Gd1 -3.4(3) . . . . . ?    | C27 C38 C39 C40 -175.9(3) . . . . ?     |
| C26 C22 N23 Gd1 174.45(18) . . . . ?   | C38 C39 C40 C41 -0.8(5) . . . . . ?     |
| N8 Gd1 N23 C22 117.57(19) . . . . . ?  | C39 C40 C41 C42 0.0(5) . . . . . ?      |
| O1A Gd1 N23 C22 -72.3(2) . . . . . ?   | C40 C41 C42 C43 -0.3(4) . . . . . ?     |
| N1 Gd1 N23 C22 163.7(2) . . . . . ?    | C39 C38 C43 C42 -2.3(4) . . . . . ?     |
| N13 Gd1 N23 C22 27.0(2) . . . . . ?    | C27 C38 C43 C42 175.7(2) . . . . . ?    |
| O1C Gd1 N23 C22 82.87(19) . . . . . ?  | C41 C42 C43 C38 1.5(4) . . . . . ?      |
| O1B Gd1 N23 C22 -63.47(19) . . . . . ? | O3A N1A O1A Gd1 -179.9(2) . . . . ?     |
| O2B Gd1 N23 C22 -115.44(19) . . . . ?  | O2A N1A O1A Gd1 1.7(3) . . . . . ?      |
| N20 Gd1 N23 C22 4.98(18) . . . . . ?   | N8 Gd1 O1A N1A 66.87(17) . . . . . ?    |
| O2A Gd1 N23 C22 -141.95(18) . . . . ?  | N23 Gd1 O1A N1A -106.41(18) . . . . ?   |
| N1B Gd1 N23 C22 -89.29(19) . . . . . ? | N1 Gd1 O1A N1A 1.6(2) . . . . . ?       |
| N8 Gd1 N23 C24 -71.7(2) . . . . . ?    | N13 Gd1 O1A N1A 135.04(18) . . . . . ?  |
| O1A Gd1 N23 C24 98.4(2) . . . . . ?    | O1C Gd1 O1A N1A 111.21(17) . . . . . ?  |
| N1 Gd1 N23 C24 -25.5(2) . . . . . ?    | O1B Gd1 O1A N1A -115.73(18) . . . . ?   |
| N13 Gd1 N23 C24 -162.2(2) . . . . . ?  | O2B Gd1 O1A N1A -64.84(17) . . . . . ?  |
| O1C Gd1 N23 C24 -106.4(2) . . . . . ?  | N20 Gd1 O1A N1A -171.40(16) . . . . ?   |
| O1B Gd1 N23 C24 107.3(2) . . . . . ?   | O2A Gd1 O1A N1A -0.92(14) . . . . . ?   |
| O2B Gd1 N23 C24 55.3(2) . . . . . ?    | N1B Gd1 O1A N1A -88.99(17) . . . . . ?  |
| N20 Gd1 N23 C24 175.7(2) . . . . . ?   | O3A N1A O2A Gd1 -179.8(2) . . . . . ?   |
| O2A Gd1 N23 C24 28.8(2) . . . . . ?    | O1A N1A O2A Gd1 -1.5(2) . . . . . ?     |
| N1B Gd1 N23 C24 81.4(2) . . . . . ?    | N8 Gd1 O2A N1A -96.54(16) . . . . . ?   |
| C22 N23 C24 C27 -178.8(2) . . . . . ?  | N23 Gd1 O2A N1A 129.25(15) . . . . . ?  |
| Gd1 N23 C24 C27 9.6(4) . . . . . ?     | O1A Gd1 O2A N1A 0.90(14) . . . . . ?    |
| C22 N23 C24 C25 -1.3(3) . . . . . ?    | N1 Gd1 O2A N1A -176.88(17) . . . . . ?  |
| Gd1 N23 C24 C25 -172.87(17) . . . . ?  | N13 Gd1 O2A N1A -41.30(17) . . . . . ?  |
| N23 C24 C25 C26 0.5(3) . . . . . ?     | O1C Gd1 O2A N1A -120.95(16) . . . . . ? |
| C27 C24 C25 C26 177.9(3) . . . . . ?   | O1B Gd1 O2A N1A 57.65(16) . . . . . ?   |
| C24 C25 C26 C22 0.4(3) . . . . . ?     | O2B Gd1 O2A N1A 100.88(17) . . . . . ?  |
| N23 C22 C26 C25 -1.3(3) . . . . . ?    | N20 Gd1 O2A N1A 18.7(2) . . . . . ?     |
| C21 C22 C26 C25 176.3(3) . . . . . ?   | N1B Gd1 O2A N1A 76.85(16) . . . . . ?   |
| N23 C24 C27 C2 10.6(4) . . . . . ?     | N8 Gd1 N1B O3B -29.6(12) . . . . . ?    |
| C25 C24 C27 C2 -166.4(3) . . . . . ?   | N23 Gd1 N1B O3B 179(100) . . . . . ?    |
| N23 C24 C27 C38 -170.1(2) . . . . . ?  | O1A Gd1 N1B O3B 10.1(12) . . . . . ?    |
| C25 C24 C27 C38 12.8(4) . . . . . ?    | N1 Gd1 N1B O3B -110.8(12) . . . . . ?   |
| N1 C2 C27 C24 5.5(4) . . . . . ?       | N13 Gd1 N1B O3B 59.1(12) . . . . . ?    |
| C3 C2 C27 C24 -178.5(2) . . . . . ?    | O1C Gd1 N1B O3B 165.0(11) . . . . . ?   |
| N1 C2 C27 C38 -173.8(2) . . . . . ?    | O1B Gd1 N1B O3B 89.5(12) . . . . . ?    |
| C3 C2 C27 C38 2.2(4) . . . . . ?       | O2B Gd1 N1B O3B -98.6(12) . . . . . ?   |
| C7 C6 C28 C33 123.5(3) . . . . . ?     | N20 Gd1 N1B O3B 114.0(12) . . . . . ?   |
| C5 C6 C28 C33 -56.6(3) . . . . . ?     | O2A Gd1 N1B O3B -39.2(12) . . . . . ?   |
| C7 C6 C28 C29 -58.0(3) . . . . . ?     | N8 Gd1 N1B O1B -119.12(16) . . . . . ?  |



|                                     |                                     |
|-------------------------------------|-------------------------------------|
| N23 Gd1 N1B O1B 89.59(16) . . . ?   | O1C Gd1 O2B N1B 119.60(15) . . . ?  |
| O1A Gd1 N1B O1B -79.41(16) . . . ?  | O1B Gd1 O2B N1B 4.47(13) . . . ?    |
| N1 Gd1 N1B O1B 159.63(15) . . . ?   | N20 Gd1 O2B N1B 34.49(16) . . . ?   |
| N13 Gd1 N1B O1B -30.49(17) . . . ?  | O2A Gd1 O2B N1B -111.98(16) . . . ? |
| O1C Gd1 N1B O1B 75.45(19) . . . ?   | N8 Gd1 O1C C2C -33.82(19) . . . ?   |
| O2B Gd1 N1B O1B 171.9(2) . . . ?    | N23 Gd1 O1C C2C 122.4(2) . . . ?    |
| N20 Gd1 N1B O1B 24.45(15) . . . ?   | O1A Gd1 O1C C2C -80.5(2) . . . ?    |
| O2A Gd1 N1B O1B -128.78(16) . . . ? | N1 Gd1 O1C C2C 45.2(2) . . . ?      |
| N8 Gd1 N1B O2B 69.01(18) . . . ?    | N13 Gd1 O1C C2C -103.8(2) . . . ?   |
| N23 Gd1 N1B O2B -82.29(15) . . . ?  | O1B Gd1 O1C C2C 171.83(18) . . . ?  |
| O1A Gd1 N1B O2B 108.72(15) . . . ?  | O2B Gd1 O1C C2C 93.2(2) . . . ?     |
| N1 Gd1 N1B O2B -12.24(15) . . . ?   | N20 Gd1 O1C C2C -169.1(2) . . . ?   |
| N13 Gd1 N1B O2B 157.64(14) . . . ?  | O2A Gd1 O1C C2C -10.2(2) . . . ?    |
| O1C Gd1 N1B O2B -96.43(17) . . . ?  | N1B Gd1 O1C C2C 136.53(19) . . . ?  |
| O1B Gd1 N1B O2B -171.9(2) . . . ?   | loop_                               |
| N20 Gd1 N1B O2B -147.42(15) . . . ? | _geom_hbond_atom_site_label_D       |
| O2A Gd1 N1B O2B 59.35(15) . . . ?   | _geom_hbond_atom_site_label_H       |
| O3B N1B O1B Gd1 -169.7(2) . . . ?   | _geom_hbond_atom_site_label_A       |
| O2B N1B O1B Gd1 7.8(2) . . . ?      | _geom_hbond_distance_DH             |
| N8 Gd1 O1B N1B 95.19(17) . . . ?    | _geom_hbond_distance_HA             |
| N23 Gd1 O1B N1B -83.55(15) . . . ?  | _geom_hbond_distance_DA             |
| O1A Gd1 O1B N1B 90.56(16) . . . ?   | _geom_hbond_angle_DHA               |
| N1 Gd1 O1B N1B -24.46(18) . . . ?   | _geom_hbond_site_symmetry_A         |
| N13 Gd1 O1B N1B 153.76(15) . . . ?  | O1C H1C O34 0.76(3) 2.08(3)         |
| O1C Gd1 O1B N1B -132.60(14) . . . ? | 2.791(3) 155(3) 3_556               |
| O2B Gd1 O1B N1B -4.49(13) . . . ?   | _diffnrm_measured_fraction_theta_ma |
| N20 Gd1 O1B N1B -152.79(17) . . . ? | x 0.990                             |
| O2A Gd1 O1B N1B 48.83(16) . . . ?   | _diffnrm_reflms_theta_full          |
| O3B N1B O2B Gd1 169.7(2) . . . ?    | 27.50                               |
| O1B N1B O2B Gd1 -7.8(2) . . . ?     | _diffnrm_measured_fraction_theta_fu |
| N8 Gd1 O2B N1B -132.24(14) . . . ?  | ll 0.990                            |
| N23 Gd1 O2B N1B 90.08(15) . . . .   | _refine_diff_density_max 1.379      |
| O1A Gd1 O2B N1B -64.65(15) . . . ?  | _refine_diff_density_min -1.046     |
| N1 Gd1 O2B N1B 167.68(15) . . . .   | _refine_diff_density_rms 0.096      |
| N13 Gd1 O2B N1B -32.88(19) . . . ?  |                                     |
